# Supplementary material for: Bronchoalveolar Lavage-microRNAs Are Potential Novel Biomarkers of Outcome After Lung Transplantation
Source: PubMed Central journal article supplement — Transplant Direct. 2020 Apr 9;6(5):e547. doi: 10.1097/TXD.0000000000000994 (PMC7213607; doi:10.1097/txd.0000000000000994), 2020-04-09
Supplement: txd-6-e547-s001.pdf [file txd-6-e547-s001.pdf]

# **BAL-miRNAs are potential novel biomarkers of outcome after lung transplantation**

## **SUPPLEMENTAL DIGITAL CONTENT**

Supplementary Material includes Suppl. Methods, Figures with corresponding Legend and 13 Suppl. Tables

### **Supplemental Methods**

#### *Lung Transplantation protocol*

Donor lung selection. Donor lung suitability is determined according to usual criteria, including clinical history, chest X-ray, arterial blood gas analysis, bronchoscopy, duration of mechanical ventilation and visual inspection. Anthropometric characteristics, cause of death and Oto score were also recorded. Questionable grafts or from extended criteria donors, including donors after cardiac death, were evaluated with ex-vivo lung perfusion (EVLP) before transplantation. Lung procurement technique. We usually perform bi-pulmonary block retrieval. Before anterograde flush of Perfadex, prostaglandin E1 is injected into the pulmonary artery. We are also using retrograde flush with Perfadex at the time of the back-table. Lung transplantation technique. The surgical approach for BLTx is 2 separate anterolateral thoracotomies. A bilateral trans-sternal anterior thoracotomy (clamshell incision) is used for providing added exposure when a relatively small chest cavity makes hilar exposure difficult or if central extracorporeal support is instituted. Close attention is paid to continuous topical cooling of the donor lung during the implantation; the

donor lung is placed in a bed of ice slush into the thoracic cavity. First, the bronchial anastomoses are carried out with absorbable suture materials in 2 continuous sutures. Then we perform the vascular anastomoses, pulmonary artery and atrium, with non-absorbable suture materials in 2 continuous sutures. The pleural spaces are drained with 2 drains (no. 28 and 32) in each pleural space. The sternum is reapproximated using the sternal wires. The ribs are reapproximated with heavy interrupted figure-of-eight multifilament absorbable suture. The pectoralis muscle, fascia and the subcutaneous tissue are approximated with monofilament absorbable suture. Skin is reapproximated with staples.

Recipient selection and care after transplantation. Recipient selection, donor/recipient matching, care after LuTx, antibiotic prophylaxis, immunosuppression regimens, and surveillance bronchoscopy are carried out according to current standard practice at our Institution. Briefly, standard immunosuppression consisted of prednisone, tacrolimus, azathioprine, without specific induction therapy. Episodes of rejection were treated with intravenous methylprednisolone at a dose of 1 g/d for 3 days followed by steroid taper. Perioperative antibiotics consisting of a third-generation cephalosporin or target therapy if specific colonization. Prophylaxis against *Pneumocystis carinii* (Bactrim) is standard, whereas cytomegalovirus (CMV) prophylaxis is determined by preoperative serologic status of both donor and recipient and postoperative monitoring (Ganciclovir/Valganciclovir). Patients receive an initial routine bronchoscopic surveillance before hospital discharge. Routine surveillance bronchoscopic examinations is planned for 4 to 8 weeks postoperatively and then every 3 months during the first postoperative year. Results of pulmonary function test, radiographic findings and clinical symptoms determine the need for additional bronchoscopic evaluations. Pulmonary trans-bronchial biopsies (TBB) are scheduled at 3, 6, 12 months after transplantation.

Recipient data recorded included: lung allocation score (LAS), diagnosis, type of

transplantation, intraoperative warm ischemia time, need of cardiopulmonary support during surgery (extracorporeal membrane oxygenation, ECMO). Short-term outcome for recipients included days to extubation, highest primary graft dysfunction (PGD) grade within 72 hours, onset of bronchial anastomotic complications and 6 months survival.

All patients undergo bronchoscopic surveillance with BAL 7 and 15 days after surgery. Pulmonary trans-bronchial biopsies (TBB) were scheduled at 3, 6 and 12 months after transplantation, and in case of lung function decline or other clinical suspect of ALAD.

For histological AR (h-AR), the most severe grade A or B detected during the follow-up is indicated (Table 1).

As ALAD we intended all cases with acute decline of FEV1 (>20% drop compared with the posttransplant baseline) due to acute infections, pneumonia or acute cellular or antibody-mediated rejection. For acute clinical rejection (c-AR), we intended all symptomatic cases for which the pulmonary function tests showed a decline in FEV1, serological testing on BAL excluded pneumonia but TBB histology of was either missing or negative.

### *miRNAs profiling*

An exogenous spike-in RNA (cel-miR-39) was added to all BALs to monitor RNA purification procedures as described.[5] Total RNA was purified using the RNeasy serum/plasma kit (Qiagen) and 90 ng of total RNA per sample were reverse transcribed and preamplified using the Megaplex Primers Pools A and B. Then cDNA was loaded on the TaqMan Array Human MicroRNA Card Set v3.0 and analyzed on an ABI PRISM 7900HT Sequence Detection System as previously described.[6]

MiRNA profiles were then obtained using the TLDA miRNA Human A and B Cards (all from Thermo Fischer Scientific). Only miRNAs present in the miRBASE v21 were considered for the analyses. miRNAs whose mean raw data (Ct) less 1 standard

deviation was above 35 (mean miRNA Ct – sd>35) were considered undetermined and excluded from further analysis. For the remaining miRNAs, Cts were converted into relative quantities (RQ) using the global mean method. For statistical purposes, miRNAs RQ were median-normalized and log2-transformed.

## Supplementary Figures

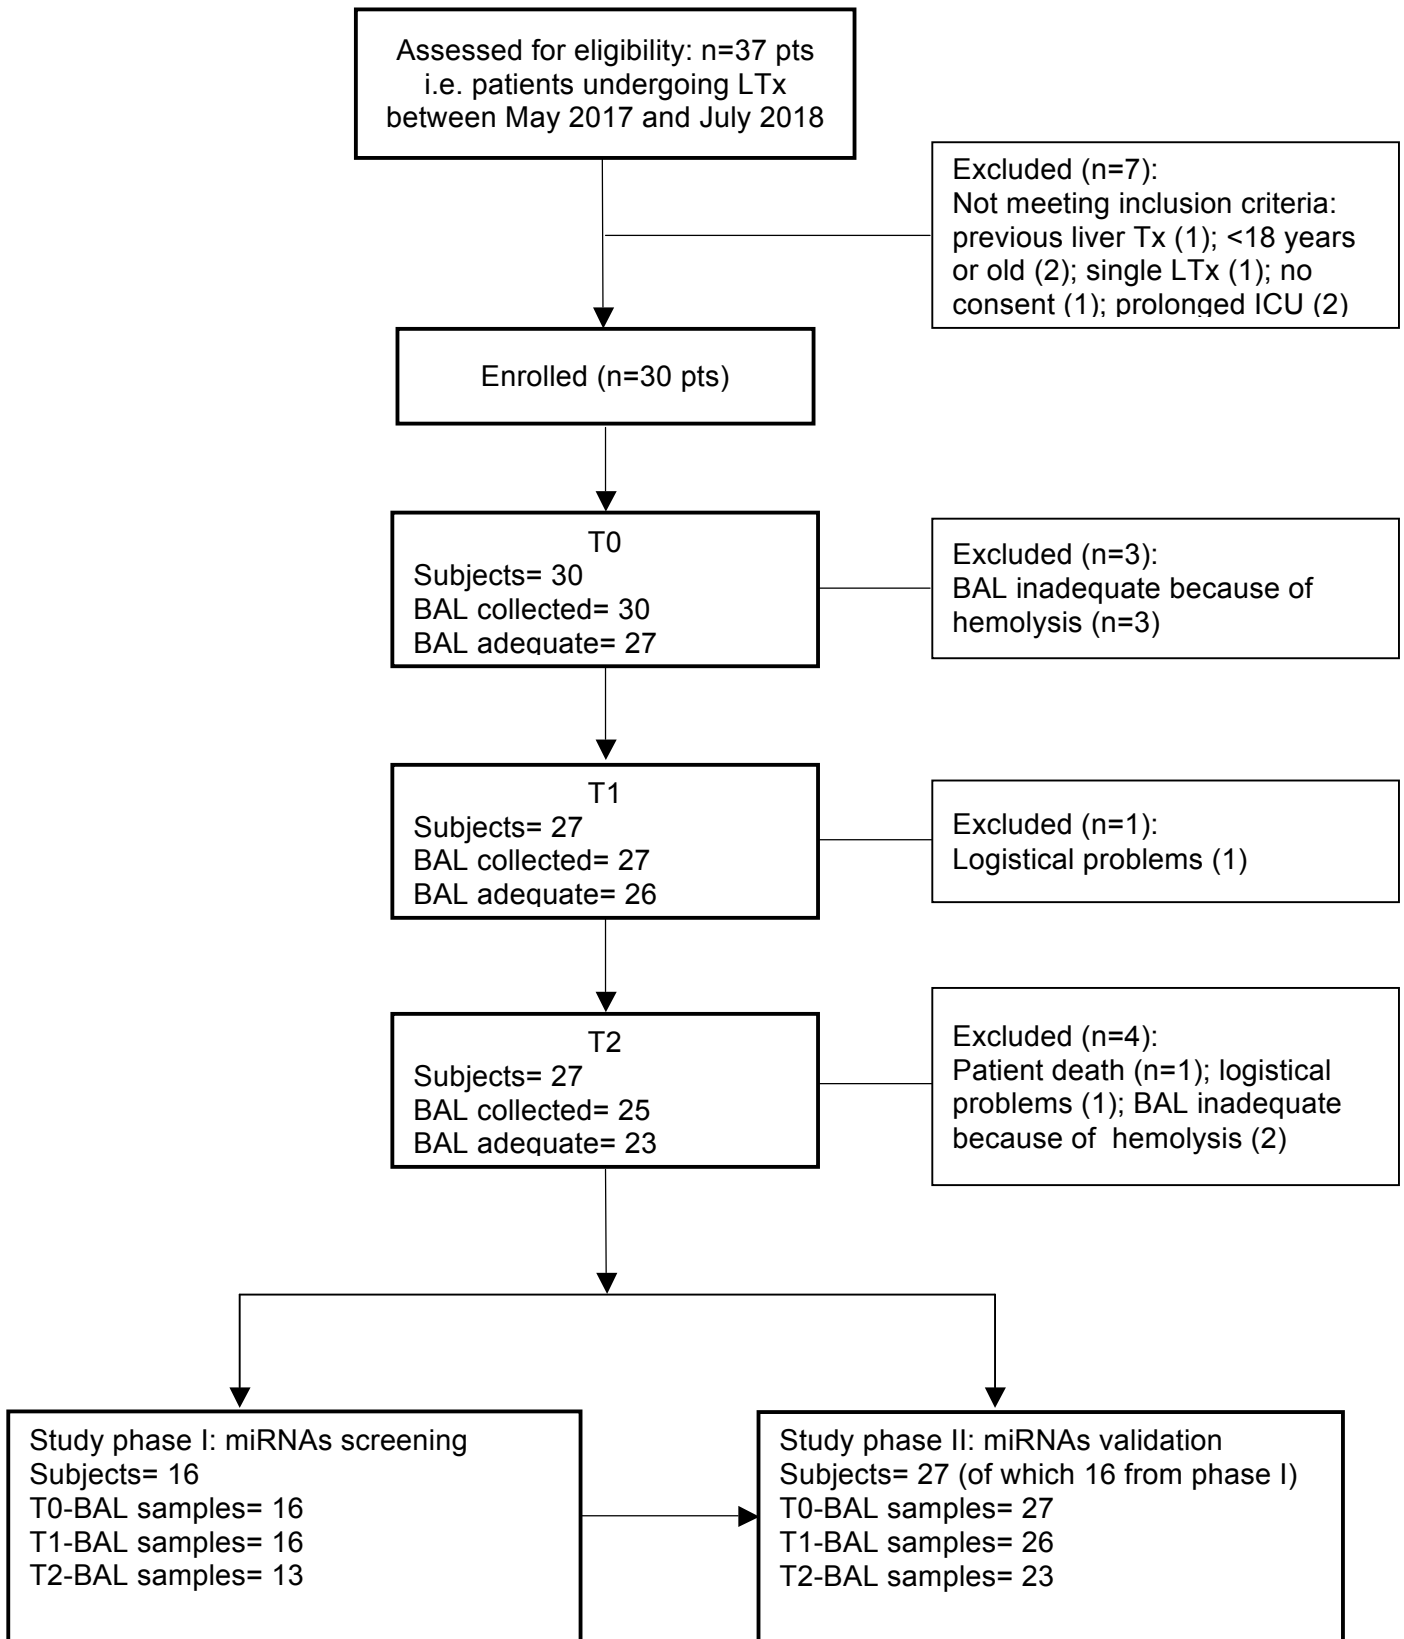

**FIGURE S1** Consort chart.

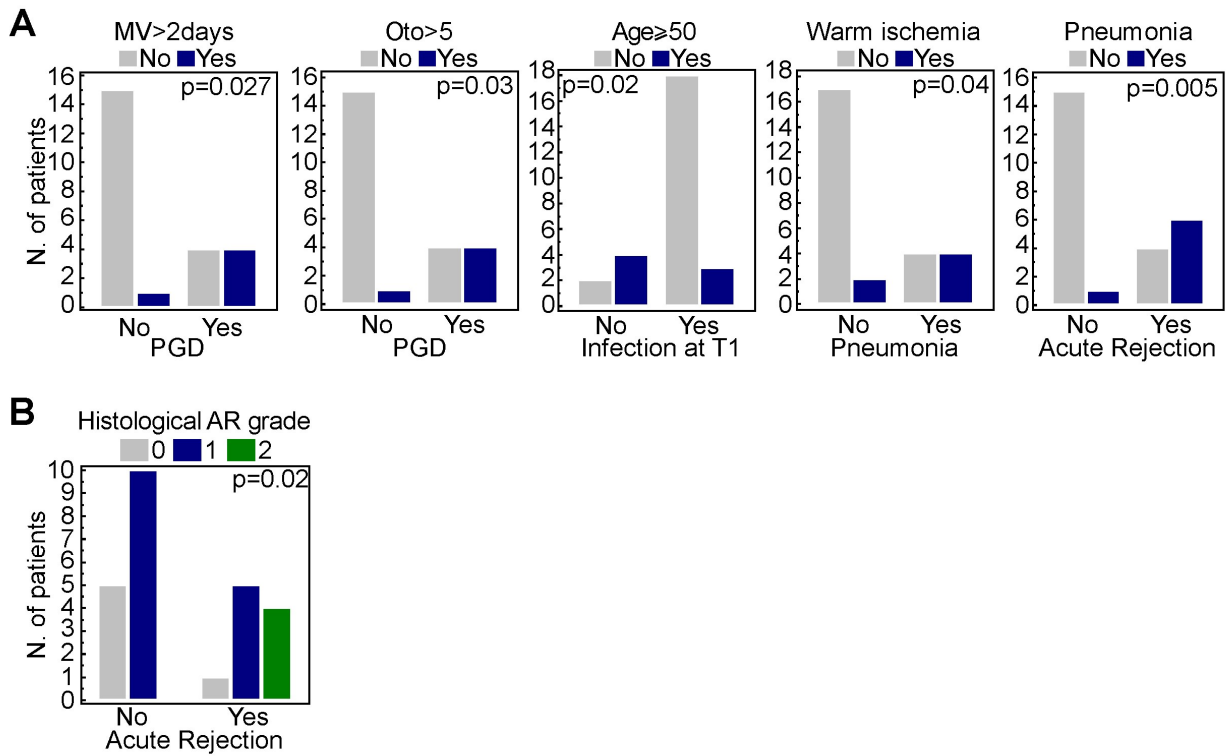

**FIGURE S2** Clinical variables provide marginal information about early graft dysfunction. **(A)** The correlations between recipient-, donor-, and surgery-related variables or pneumonia with PGD, infections, pneumonia or acute rejection (clinical AR within the first year after LTx) were evaluated by Fisher's exact test. **(B)** Concordance between AR detected by histological examination of TBB and clinical AR. P value is from chi-square test. For both analyses the complete patients series was used (n=27).

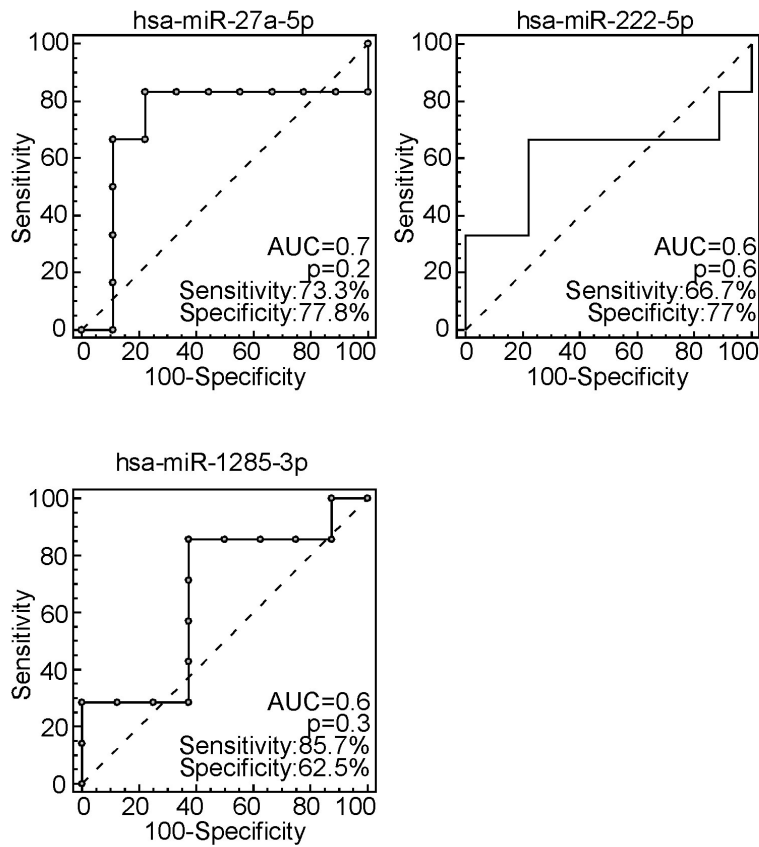

**FIGURE S3** ROC curves were generated to test the accuracy of the indicated T0-miRNAs (miR-27a-5p, miR-222-5p) or T1-miR-1285-3p in classifying patients according to clinical AR in first year after LTx. The cut-off for miRNA expression was calculated using Youden's J statistic. AUC, area under curve; 95% CI, 95% confidence interval.

**Table S1.** Additional patients details are provided

| Patient code | Study phase              | Microbial colonization of recipient |          |                 | Mismatch       | Surgery-related features      |          |           | posttransplantation– associated features |               |                  |                  |
|--------------|--------------------------|-------------------------------------|----------|-----------------|----------------|-------------------------------|----------|-----------|------------------------------------------|---------------|------------------|------------------|
|              |                          | P. aeruginos:                       | Bacteria | Aspergillus spp | Age(D/R_ratio) | Mechanical_ventilation (days) | ECMO_pre | ECMO_post | Neoplasia                                | Infection_BAI | Infection_BAL_T1 | Infection_BAL_T2 |
| LTx_1        | miR screening+validation | Y                                   | Y        | N               | 1,615          | 1                             | N        | N         | N                                        | 1             | 1                | 1                |
| LTx_2        | miR screening+validation | N                                   | N        | N               | 0,65625        | 2                             | N        | N         | N                                        | 0             | 0                | 0                |
| LTx_3        | miR screening+validation | Y                                   | Y        | N               | 1,3            | 1                             | Y        | Y         | N                                        | 1             | 1                | 1                |
| LTx_4        | miR screening+validation | Y                                   | Y        | N               | 1,113636364    | 0                             | N        | N         | N                                        | 1             | 1                | 1                |
| LTx_5        | miR screening+validation | N                                   | Y        | N               | 2,380952381    | 1                             | N        | N         | Y                                        | 1             | 1                | 0                |
| LTx_6        | miR screening+validation | N                                   | Y        | N               | 0,722222222    | 0                             | N        | N         | N                                        | 0             | 1                | 0                |
| LTx_7        | miR screening+validation | N                                   | Y        | Y               | 1,454545455    | 1                             | N        | N         | N                                        | 1             | 1                | 0                |
| LTx_8        | miR screening+validation | Y                                   | Y        | N               | 0,65625        | 0                             | N        | N         | N                                        | 1             | 1                | 1                |
| LTx_9        | miR screening+validation | N                                   | N        | N               | 0,935483871    | 1                             | N        | N         | N                                        | 0             | 0                | 0                |
| LTx_10       | miR screening+validation | N                                   | N        | N               | 1,046511628    | 6                             | N        | N         | N                                        | 1             | 1                | 0                |
| LTx_11       | miR screening+validation | N                                   | N        | N               | 0,962962963    | 7                             | N        | N         | N                                        | 1             | 1                | 0                |
| LTx_12       | miR screening+validation | Y                                   | Y        | N               | 2,125          | 3                             | N        | N         | N                                        | 1             | 0                | 1                |
| LTx_13       | miR screening+validation | Y                                   | Y        | N               | 1,702702703    | 1                             | N        | Y         | N                                        | 1             | 1                | 1                |
| LTx_14       | miR screening+validation | Y                                   | Y        | Y               | 2,214285714    | 2                             | N        | N         | N                                        | 1             | 1                | 0                |
| LTx_15       | miR screening+validation | Y                                   | Y        | Y               | 2,095238095    | 1                             | N        | N         | N                                        | 1             | 1                | 0                |
| LTx_16       | miR screening+validation | N                                   | N        | N               | 1              | 4                             | N        | N         | N                                        | 0             | 0                | 1                |
| LTx_17       | miR validation           | Y                                   | Y        | Y               | 1,04           | 1                             | N        | N         | N                                        | 1             | 1                | 1                |
| LTx_18       | miR validation           | N                                   | N        | N               | 0,98           | 0                             | N        | N         | N                                        | 1             | 0                | 0                |
| LTx_19       | miR validation           | Y                                   | Y        | Y               | 1,46           | 1                             | N        | N         | N                                        | 1             | 0                | 0                |
| LTx_20       | miR validation           | Y                                   | Y        | Y               | 2,65           | 2                             | N        | N         | Y                                        | 1             | 1                | 1                |
| LTx_21       | miR validation           | Y                                   | Y        | N               | 1,32           | 1                             | N        | N         | N                                        | 1             | 1                | 1                |
| LTx_22       | miR validation           | N                                   | N        | N               | 0,67           | 7                             | N        | Y         | N                                        | 0             | 1                | 0                |
| LTx_23       | miR validation           | Y                                   | Y        | Y               | 1,08           | 0                             | N        | N         | N                                        | 1             | 1                | 1                |
| LTx_24       | miR validation           | Y                                   | Y        | Y               | 0,473          | 1                             | N        | N         | N                                        | 1             | 1                | 0                |
| LTx_25       | miR validation           | N                                   | N        | N               | 0,92           | 4                             | N        | Y         | N                                        | 1             | 1                | 1                |
| LTx_26       | miR validation           | Y                                   | Y        | N               | 0,5588         | 1                             | N        | N         | N                                        | 0             | 1                | 1                |
| LTx_27       | miR validation           | Y                                   | Y        | Y               | 1,8            | 0                             | N        | N         | N                                        | 1             | 1                | 1                |



**Table S2.** Biological processes (GO terms) predicted to be targeted by k-means cluster 1 and 2 miRNA (more expressed at T0,1). Only signaling with a q-value =0 are reported.

| geneSet    | description                                     | link                                                                                                                  | size | overlap | expect      | enrichmentRatio | pValue | FDR | overlapId     | database                        | userid                                                                                                                                                                                                                                                                                                                  |
|------------|-------------------------------------------------|-----------------------------------------------------------------------------------------------------------------------|------|---------|-------------|-----------------|--------|-----|---------------|---------------------------------|-------------------------------------------------------------------------------------------------------------------------------------------------------------------------------------------------------------------------------------------------------------------------------------------------------------------------|
| GO:1902531 | regulation of intracellular signal transduction | <a href="http://amigo.geneontology.org/amigo/term/GO:1902531">http://amigo.geneontology.org/amigo/term/GO:1902531</a> | 1824 | 117     | 39,15544927 | 2,988089837     | 0      | 0   | 19;100;142;20 | geneontology_Biological_Process | GF;RASA1;CRK;MAPK1;IRAK4;KRAS;MAPK7;PTGS2;AKT1;MDM2;BCL2;CD44;BRAF;IGF1R;TNF;SOX2;KLF4;IRS1;MYC;IRS2;ESR1;PAK4;ILK;MAP2K6;TMEM98;TSPAN6;MYO5A;SOX9;CD28;FOXO1;KDR;RAF1;CDC42;CHUK;BCL2L2;BTRC;MET;MAPK14;CAV2;MTOR;STK11;IGF1;PTEN;ERBB4;SOCS1;PRMT5;BCL2L1;KIT;ABCA1;PSAP;PHLPP1;SOCS3;DDIT4;TBK1;TIMP3;TNFSF10;ICAM1; |
| GO:0010629 | negative regulation of gene expression          | <a href="http://amigo.geneontology.org/amigo/term/GO:0010629">http://amigo.geneontology.org/amigo/term/GO:0010629</a> | 1733 | 107     | 37,20197016 | 2,876191759     | 0      | 0   | 91;142;207;33 | geneontology_Biological_Process | 1;AKT1;MDM2;RREB1;KLF5;TNF;DDX6;SOX2;KLF4;MYC;PPM1D;CPEB4;EIF4E;ITGB8;ESR1;SOX9;SMAD3;HMG2;E2F3;CD28;CCNE1;CCND1;AXIN2;PURA;SMAD7;FOXO1;KDR;RUNX2;CCND3;MBD1;DICER1;BIRC5;MYB;BTRC;MAPK14;SMARCA2;MTOR;IGF1;MECP2;ATXN1;MYCN;MXD1;ZBTB4;DNMT1;CDKN1B;FOXO3;CDKN1C;TBK1;CREBZF;TCEAL1;TRPS1;ZEB2;CTCF;MXI1;HDAC4         |
| GO:0044093 | positive regulation of molecular function       | <a href="http://amigo.geneontology.org/amigo/term/GO:0044093">http://amigo.geneontology.org/amigo/term/GO:0044093</a> | 1717 | 100     | 36,85850131 | 2,713078298     | 0      | 0   | 142;207;317;3 | geneontology_Biological_Process | ASA1;CRK;CCNB1;BDNF;MAPK1;IRAK4;KRAS;AKT1;BCL2;BRAF;TNF;KLF4;IRS1;MYC;ESR1;PAK4;ILK;ADAM17;GMFB;SERINC5;MAP2K6;APH1A;SMAD3;TGFB2;HMG2;CFTR;CCND1;RAF1;CCND3;CDC42;CAB39;CHUK;ATG14;MET;MAPK8;MAPK14;CAV2;MTOR;STK11;IGF1;PTEN;SOCS1;BCL2L1;KIT;PSAP;CDKN1B;BBC3;TNFSF10;ICAM1;SELE;DVL2;ZEB2;APAF1;RAB1A;FGFR3;GIT1;    |
| GO:0048585 | negative regulation of response to stimulus     | <a href="http://amigo.geneontology.org/amigo/term/GO:0048585">http://amigo.geneontology.org/amigo/term/GO:0048585</a> | 1545 | 101     | 33,16621114 | 3,045267956     | 0      | 0   | 100;207;596;5 | geneontology_Biological_Process | K7;SERPINE1;PTGS2;AKT1;MDM2;BCL2;CD44;IGF1R;TNF;SOX2;KLF4;IRS1;MYC;ESR1;SOCS7;ADAM17;KREMEN1;MMP14;TSPAN6;ETS1;SOX9;SMAD3;TGFB2;CTNND1;CDK6;HMG2;RPS6KB1;AXIN2;SMAD7;FOXO1;SMURF1;KDR;RAF1;RUNX2;CDC42;BCL2L2;BTRC;MET;MAPK14;CAV2;MTOR;STK11;IGF1;PTEN;ERBB4;SOCS1;KIT;PSAP;PHLPP1;SOCS3;CDKN1B;FOXO3;DDIT4;DKK2;      |
| GO:0002682 | regulation of immune system process             | <a href="http://amigo.geneontology.org/amigo/term/GO:0002682">http://amigo.geneontology.org/amigo/term/GO:0002682</a> | 1400 | 87      | 30,05352466 | 2,894835165     | 0      | 0   | 60;91;92;100; | geneontology_Biological_Process | E1;JAG1;AKT1;BCL2;BRAF;TNF;YES1;HOXA9;MYC;IRS2;ESR1;NRAS;ADAM17;MAP2K6;AP1G1;MMP14;MIXL1;TSPAN6;ETS1;ACTB;SOX9;SMAD3;TGFB2;CDK6;CD28;RAF1;CDC42;CHUK;MYB;MAPK9;MAPK8;MAPK14;MTOR;STK11;IGF1;HOXA5;KAT2B;SOCS1;KIT;PHLPP1;SOCS3;FOXO3;TBK1;ICAM1;FOS;CORO1A;PIK3R1;MAFB;ADA;P2RX7;IGF2;MUC4;EP300;CCR6;ACV2A;            |
| GO:0043085 | positive regulation of catalytic activity       | <a href="http://amigo.geneontology.org/amigo/term/GO:0043085">http://amigo.geneontology.org/amigo/term/GO:0043085</a> | 1380 | 88      | 29,62418859 | 2,970545496     | 0      | 0   | 207;317;396;5 | geneontology_Biological_Process | CCNB1;BDNF;MAPK1;KRAS;AKT1;BCL2;BRAF;TNF;KLF4;IRS1;MYC;ESR1;PAK4;ILK;ADAM17;GMFB;SERINC5;MAP2K6;APH1A;SMAD3;TGFB2;HMG2;CCND1;RAF1;CCND3;CDC42;CAB39;ATG14;MAPK8;MAPK14;CAV2;MTOR;STK11;IGF1;PTEN;SOCS1;BCL2L1;KIT;PSAP;CDKN1B;BBC3;TNFSF10;ICAM1;SELE;DVL2;ZEB2;APAF1;RAB1A;FGFR3;GIT1;PDGFRA;P2RX7;IGF2;SRCIN1;ZNF6    |
| GO:0080134 | regulation of response to stress                | <a href="http://amigo.geneontology.org/amigo/term/GO:0080134">http://amigo.geneontology.org/amigo/term/GO:0080134</a> | 1361 | 95      | 29,21631933 | 3,251607396     | 0      | 0   | 100;142;164;2 | geneontology_Biological_Process | 1;IRAK4;KRAS;MAPK7;SERPINE1;PTGS2;AKT1;MDM2;BCL2;RREB1;CD44;BRAF;IGF1R;TNF;KLF4;MYC;ESR1;NRAS;MAP2K6;AP1G1;TSPAN6;ETS1;SMAD3;TGFB2;CDK6;HMG2;CD28;AXIN2;FOXO1;RAF1;CDC42;CHUK;MET;MAPK14;MTOR;PTEN;SOCS1;BCL2L1;PSAP;PHLPP1;SOCS3;CDKN1B;FOXO3;TBK1;SELE;CERS2;DVL2;ZEB2;PIK3R1;MGMT;RAD51;BCL2L1;PDGFRA;ADA;MUC        |
| GO:0001944 | vasculature development                         | <a href="http://amigo.geneontology.org/amigo/term/GO:0001944">http://amigo.geneontology.org/amigo/term/GO:0001944</a> | 682  | 60      | 14,64035987 | 4,098259916     | 0      | 0   | 182;207;388;5 | geneontology_Biological_Process | AKT1;MDM2;KLF5;KLF4;ITGB8;PAK4;MMP14;ETS1;COL5A1;TGFB2;SP1;HMG2;RECK;SMAD7;FOXO1;KDR;CDC42;MAPK14;STK11;HOXA5;MECP2;PTEN;BMP2;KIT;SOCS3;DNMT1;MMP2;PDGFRA;PAX6;NOTCH3;LUZP1;HMOX1;FGF2;BRCA1;AKT3;WNT4;SOX4;NDST1;RHOB;FBXW7;LIF;PRDM1;E2F2;NOTCH1;TGFB1;MAP2K1                                                         |
| GO:0001568 | blood vessel development                        | <a href="http://amigo.geneontology.org/amigo/term/GO:0001568">http://amigo.geneontology.org/amigo/term/GO:0001568</a> | 654  | 55      | 14,03928937 | 3,917577203     | 0      | 0   | 182;207;388;5 | geneontology_Biological_Process | AKT1;MDM2;KLF5;KLF4;ITGB8;PAK4;MMP14;ETS1;COL5A1;TGFB2;SP1;HMG2;RECK;SMAD7;FOXO1;KDR;CDC42;MAPK14;HOXA5;MECP2;PTEN;BMP2;SOCS3;MMP2;PDGFRA;PAX6;NOTCH3;LUZP1;HMOX1;FGF2;BRCA1;AKT3;WNT4;SOX4;NDST1;RHOB;FBXW7;PRDM1;E2F2;NOTCH1;TGFB1;MAP2K1                                                                             |
| GO:0009611 | response to wounding                            | <a href="http://amigo.geneontology.org/amigo/term/GO:0009611">http://amigo.geneontology.org/amigo/term/GO:0009611</a> | 642  | 54      | 13,78168773 | 3,918242891     | 0      | 0   | 60;596;673;89 | geneontology_Biological_Process | L2;RREB1;CD44;BRAF;HNF4A;SOX2;KLF4;ILK;ADAM17;ETS1;COL5A1;ACTB;SMAD3;TGFB2;RPS6KB1;RAF1;CDC42;MTOR;IGF1;PTEN;ERBB4;CDKN1B;CERS2;PIK3R1;PDGFRA;PAX6;P2RX7;TNXN2;ITGA2;HMOX1;FGF2;WNT3A;WNT4;NOTCH1;DHFR;TGFB1;CDK1;PTPRF;EZH2;HDAC1;ITPR1;MAP2K1                                                                         |

**Table S3.** Biological processes (GO terms) predicted to be targeted by k-means cluster 3 miRNA (more expressed at T2).

| geneSet    | description                                                               | link                                                                                                                  | size | overlap | expect      | enrichmentRatio | pValue      | FDR | overlapId        | database                        | userId          |
|------------|---------------------------------------------------------------------------|-----------------------------------------------------------------------------------------------------------------------|------|---------|-------------|-----------------|-------------|-----|------------------|---------------------------------|-----------------|
| GO:0008637 | apoptotic mitochondrial changes                                           | <a href="http://amigo.geneontology.org/amigo/term/GO:0008637">http://amigo.geneontology.org/amigo/term/GO:0008637</a> | 116  | 3       | 0,184944767 | 16,22105911     | 8,15E-04    | 1   | 6648;27113;84883 | geneontology_Biological_Process | AIFM2;BBC3;SOD2 |
| GO:0001836 | release of cytochrome c from mitochondria                                 | <a href="http://amigo.geneontology.org/amigo/term/GO:0001836">http://amigo.geneontology.org/amigo/term/GO:0001836</a> | 59   | 2       | 0,094066735 | 21,26150121     | 0,003965128 | 1   | 6648;27113       | geneontology_Biological_Process | BBC3;SOD2       |
| GO:0048306 | calcium-dependent protein binding                                         | <a href="http://amigo.geneontology.org/amigo/term/GO:0048306">http://amigo.geneontology.org/amigo/term/GO:0048306</a> | 60   | 2       | 0,095661086 | 20,90714286     | 0,004097826 | 1   | 55696;79720      | geneontology_Molecular_Function | RBM22;VPS37B    |
| GO:0050660 | flavin adenine dinucleotide binding                                       | <a href="http://amigo.geneontology.org/amigo/term/GO:0050660">http://amigo.geneontology.org/amigo/term/GO:0050660</a> | 77   | 2       | 0,122765061 | 16,29128015     | 0,006661974 | 1   | 27034;84883      | geneontology_Molecular_Function | ACAD8;AIFM2     |
| GO:0051289 | protein homotetramerization                                               | <a href="http://amigo.geneontology.org/amigo/term/GO:0051289">http://amigo.geneontology.org/amigo/term/GO:0051289</a> | 79   | 2       | 0,125953764 | 15,87884268     | 0,007001126 | 1   | 226;6648         | geneontology_Biological_Process | SOD2;ALDOA      |
| GO:0032803 | regulation of low-density lipoprotein particle receptor catabolic process | <a href="http://amigo.geneontology.org/amigo/term/GO:0032803">http://amigo.geneontology.org/amigo/term/GO:0032803</a> | 5    | 1       | 0,007971757 | 125,4428571     | 0,00794728  | 1   | 29116            | geneontology_Biological_Process | MYLIP           |
| GO:0090677 | reversible differentiation                                                | <a href="http://amigo.geneontology.org/amigo/term/GO:0090677">http://amigo.geneontology.org/amigo/term/GO:0090677</a> | 5    | 1       | 0,007971757 | 125,4428571     | 0,00794728  | 1   | 6648             | geneontology_Biological_Process | SOD2            |
| GO:0035279 | mRNA cleavage involved in gene silencing by miRNA                         | <a href="http://amigo.geneontology.org/amigo/term/GO:0035279">http://amigo.geneontology.org/amigo/term/GO:0035279</a> | 5    | 1       | 0,007971757 | 125,4428571     | 0,00794728  | 1   | 192669           | geneontology_Biological_Process | AGO3            |
| GO:0098795 | mRNA cleavage involved in gene silencing                                  | <a href="http://amigo.geneontology.org/amigo/term/GO:0098795">http://amigo.geneontology.org/amigo/term/GO:0098795</a> | 5    | 1       | 0,007971757 | 125,4428571     | 0,00794728  | 1   | 192669           | geneontology_Biological_Process | AGO3            |
| GO:0070061 | fructose binding                                                          | <a href="http://amigo.geneontology.org/amigo/term/GO:0070061">http://amigo.geneontology.org/amigo/term/GO:0070061</a> | 5    | 1       | 0,007971757 | 125,4428571     | 0,00794728  | 1   | 226              | geneontology_Molecular_Function | ALDOA           |







|                |                        |               |              |              |                   |               |        |                |                 |                 |       |       |
|----------------|------------------------|---------------|--------------|--------------|-------------------|---------------|--------|----------------|-----------------|-----------------|-------|-------|
| Machine P      | hsa_miR_339_3p         | -2,40         | 0,030        | 0,129        |                   |               |        |                |                 |                 |       |       |
|                | hsa_miR_342_3p         | -2,84         | 0,004        | 0,065        |                   |               |        |                |                 |                 |       |       |
|                | <b>hsa_miR_345_5p</b>  | <b>-1,96</b>  | <b>0,010</b> | <b>0,079</b> |                   |               |        |                |                 |                 |       |       |
|                | hsa_miR_34b_3p         | -2,74         | 0,026        | 0,124        |                   |               |        |                |                 |                 |       |       |
|                | <b>hsa_miR_363_3p</b>  | <b>1,40</b>   | <b>0,003</b> | <b>0,065</b> |                   |               |        |                |                 |                 |       |       |
|                | <b>hsa_miR_374b_5p</b> | <b>-2,73</b>  | <b>0,005</b> | <b>0,067</b> |                   |               |        |                |                 |                 |       |       |
|                | <b>hsa_miR_376c_3p</b> | <b>1,39</b>   | <b>0,014</b> | <b>0,089</b> |                   |               |        |                |                 |                 |       |       |
|                | <b>hsa_miR_380_5p</b>  | <b>3,61</b>   | <b>0,002</b> | <b>0,062</b> |                   |               |        |                |                 |                 |       |       |
|                | <b>hsa_miR_381_3p</b>  | <b>1,81</b>   | <b>0,001</b> | <b>0,053</b> |                   |               |        |                |                 |                 |       |       |
|                | <b>hsa_miR_409_3p</b>  | <b>1,23</b>   | <b>0,018</b> | <b>0,100</b> |                   |               |        |                |                 |                 |       |       |
|                | <b>hsa_miR_423_5p</b>  | <b>-3,46</b>  | <b>0,007</b> | <b>0,071</b> |                   |               |        |                |                 |                 |       |       |
|                | <b>hsa_miR_425_5p</b>  | <b>-3,32</b>  | <b>0,011</b> | <b>0,081</b> |                   |               |        |                |                 |                 |       |       |
|                | <b>hsa_miR_449a</b>    | <b>-2,59</b>  | <b>0,015</b> | <b>0,092</b> |                   |               |        |                |                 |                 |       |       |
|                | <b>hsa_miR_454_3p</b>  | <b>-3,18</b>  | <b>0,009</b> | <b>0,073</b> |                   |               |        |                |                 |                 |       |       |
|                | <b>hsa_miR_484</b>     | <b>-1,99</b>  | <b>0,007</b> | <b>0,071</b> |                   |               |        |                |                 |                 |       |       |
|                | hsa_miR_485_3p         | 1,20          | 0,031        | 0,130        |                   |               |        |                |                 |                 |       |       |
|                | <b>hsa_miR_491_5p</b>  | <b>-1,47</b>  | <b>0,016</b> | <b>0,096</b> |                   |               |        |                |                 |                 |       |       |
|                | <b>hsa_miR_505_5p</b>  | <b>-2,42</b>  | <b>0,004</b> | <b>0,065</b> |                   |               |        |                |                 |                 |       |       |
|                | <b>hsa_miR_512_3p</b>  | <b>2,47</b>   | <b>0,004</b> | <b>0,065</b> |                   |               |        |                |                 |                 |       |       |
|                | <b>hsa_miR_516b_3p</b> | <b>3,03</b>   | <b>0,008</b> | <b>0,071</b> |                   |               |        |                |                 |                 |       |       |
|                | <b>hsa_miR_517c_3p</b> | <b>1,50</b>   | <b>0,004</b> | <b>0,065</b> |                   |               |        |                |                 |                 |       |       |
|                | <b>hsa_miR_518f_3p</b> | <b>1,36</b>   | <b>0,005</b> | <b>0,067</b> |                   |               |        |                |                 |                 |       |       |
|                | <b>hsa_miR_520c_3p</b> | <b>1,59</b>   | <b>0,003</b> | <b>0,065</b> |                   |               |        |                |                 |                 |       |       |
|                | hsa_miR_520d_3p        | 2,02          | 0,032        | 0,134        |                   |               |        |                |                 |                 |       |       |
|                | hsa_miR_523_3p         | 1,02          | 0,036        | 0,140        |                   |               |        |                |                 |                 |       |       |
|                | <b>hsa_miR_532_3p</b>  | <b>-1,67</b>  | <b>0,006</b> | <b>0,067</b> |                   |               |        |                |                 |                 |       |       |
|                | hsa_miR_532_5p         | -2,79         | 0,027        | 0,124        |                   |               |        |                |                 |                 |       |       |
|                | <b>hsa_miR_548b_5p</b> | <b>2,86</b>   | <b>0,017</b> | <b>0,098</b> |                   |               |        |                |                 |                 |       |       |
|                | <b>hsa_miR_548c_5p</b> | <b>3,62</b>   | <b>0,007</b> | <b>0,071</b> |                   |               |        |                |                 |                 |       |       |
|                | <b>hsa_miR_548d_5p</b> | <b>3,28</b>   | <b>0,011</b> | <b>0,081</b> |                   |               |        |                |                 |                 |       |       |
|                | <b>hsa_miR_550a_5p</b> | <b>1,14</b>   | <b>0,011</b> | <b>0,081</b> |                   |               |        |                |                 |                 |       |       |
|                | <b>hsa_miR_551b_5p</b> | <b>1,22</b>   | <b>0,011</b> | <b>0,081</b> |                   |               |        |                |                 |                 |       |       |
|                | hsa_miR_572            | 1,51          | 0,037        | 0,141        |                   |               |        |                |                 |                 |       |       |
|                | <b>hsa_miR_574_3p</b>  | <b>-2,62</b>  | <b>0,002</b> | <b>0,062</b> |                   |               |        |                |                 |                 |       |       |
|                | <b>hsa_miR_589_5p</b>  | <b>1,27</b>   | <b>0,001</b> | <b>0,053</b> |                   |               |        |                |                 |                 |       |       |
|                | <b>hsa_miR_591</b>     | <b>2,52</b>   | <b>0,004</b> | <b>0,065</b> |                   |               |        |                |                 |                 |       |       |
|                | hsa_miR_605_5p         | 2,52          | 0,033        | 0,134        |                   |               |        |                |                 |                 |       |       |
|                | hsa_miR_660_5p         | -3,31         | 0,029        | 0,125        |                   |               |        |                |                 |                 |       |       |
|                | <b>hsa_miR_744_5p</b>  | <b>-2,18</b>  | <b>0,016</b> | <b>0,097</b> |                   |               |        |                |                 |                 |       |       |
|                | <b>hsa_miR_769_5p</b>  | <b>-2,64</b>  | <b>0,011</b> | <b>0,081</b> |                   |               |        |                |                 |                 |       |       |
|                | <b>hsa_miR_770_5p</b>  | <b>1,93</b>   | <b>0,000</b> | <b>0,040</b> |                   |               |        |                |                 |                 |       |       |
|                | <b>hsa_miR_93_3p</b>   | <b>-2,67</b>  | <b>0,008</b> | <b>0,071</b> |                   |               |        |                |                 |                 |       |       |
|                | ECMO                   | hsa_let_7f_5p | -2,30        | 0,030        | 0,997             | hsa_let_7a_5p | -4,199 | 0,034          | 0,978           | hsa_miR_1180_3p | 2,446 | 0,042 |
| hsa_miR_1825   |                        | -2,23         | 0,029        | 0,997        | hsa_miR_146b_5p   | -2,052        | 0,020  | 0,822          | hsa_miR_1226_5p | -1,041          | 0,025 | 0,443 |
| hsa_miR_671_3p |                        | -1,77         | 0,032        | 0,997        | hsa_miR_155_5p    | -1,644        | 0,014  | 0,822          | hsa_miR_1244    | -1,080          | 0,036 | 0,443 |
|                |                        |               |              |              | hsa_miR_181a_2_3p | -1,864        | 0,023  | 0,822          | hsa_miR_125a_5p | 2,054           | 0,008 | 0,443 |
|                |                        |               |              |              | hsa_miR_181a_3p   | -1,943        | 0,023  | 0,822          | hsa_miR_15a_5p  | -1,285          | 0,045 | 0,443 |
|                |                        |               |              |              | hsa_miR_21_3p     | -2,701        | 0,010  | 0,822          | hsa_miR_18a_5p  | -1,228          | 0,045 | 0,443 |
|                |                        |               |              |              | hsa_miR_22_5p     | -1,780        | 0,027  | 0,842          | hsa_miR_191_3p  | -1,125          | 0,011 | 0,443 |
|                |                        |               |              |              | hsa_miR_27a_5p    | -1,823        | 0,045  | 0,978          | hsa_miR_200b_3p | 2,164           | 0,031 | 0,443 |
|                |                        |               |              |              | hsa_miR_30e_3p    | -1,695        | 0,007  | 0,822          | hsa_miR_205_5p  | 2,113           | 0,045 | 0,443 |
|                |                        |               |              |              | hsa_miR_34a_3p    | -2,859        | 0,002  | 0,581          | hsa_miR_20b_5p  | 2,702           | 0,045 | 0,443 |
|                |                        |               |              |              | hsa_miR_378a_5p   | -1,541        | 0,022  | 0,822          | hsa_miR_21_3p   | -2,035          | 0,042 | 0,443 |
|                |                        |               |              |              | hsa_miR_616_3p    | 1,993         | 0,023  | 0,822          | hsa_miR_23a_3p  | -1,033          | 0,045 | 0,443 |
|                |                        |               |              |              |                   |               |        |                | hsa_miR_296_5p  | 1,821           | 0,039 | 0,443 |
|                |                        |               |              |              |                   |               |        |                | hsa_miR_30d_3p  | -1,003          | 0,045 | 0,443 |
|                |                        |               |              |              |                   |               |        |                | hsa_miR_335_5p  | 2,364           | 0,020 | 0,443 |
|                |                        |               |              |              |                   |               |        |                | hsa_miR_339_5p  | -1,191          | 0,045 | 0,443 |
|                |                        |               |              |              |                   |               |        |                | hsa_miR_342_5p  | -1,061          | 0,045 | 0,443 |
|                |                        |               |              |              |                   |               |        |                | hsa_miR_424_5p  | -1,021          | 0,045 | 0,443 |
|                |                        |               |              |              |                   |               |        |                | hsa_miR_425_5p  | -1,633          | 0,011 | 0,443 |
|                |                        |               |              |              |                   |               |        |                | hsa_miR_489_3p  | -1,319          | 0,048 | 0,443 |
|                |                        |               |              |              |                   |               |        | hsa_miR_548i   | -1,066          | 0,036           | 0,443 |       |
|                |                        |               |              |              |                   |               |        | hsa_miR_622    | -1,158          | 0,039           | 0,443 |       |
|                |                        |               |              |              |                   |               |        | hsa_miR_661    | 3,716           | 0,039           | 0,443 |       |
|                |                        |               |              |              |                   |               |        | hsa_miR_98_5p  | -1,526          | 0,045           | 0,443 |       |
|                |                        |               |              |              |                   |               |        | hsa_miR_99b_3p | -2,893          | 0,008           | 0,443 |       |
|                |                        |               |              |              |                   |               |        | hsa_miR_99b_5p | 2,113           | 0,028           | 0,443 |       |

**Table S7.** Univariate analysis was conducted to explore differences of BAL-miRNAs according to posttransplant-related clinical variable (binary variables) at the 3 time-points. P values and log2ratios (l2r) are from Kolmogorov-Smirnov test whereas adjusted p values (adj\_p\_value) is from FDR correction.

| clin var                     | MIR-BAL T0       |                 |         |             | MIR-BAL T1      |                |         |                 | MIR-BAL T2      |                 |         |             |       |
|------------------------------|------------------|-----------------|---------|-------------|-----------------|----------------|---------|-----------------|-----------------|-----------------|---------|-------------|-------|
|                              | Symbol           | l2r             | p_value | adj_p_value | Symbol          | l2r            | p_value | adj_p_value     | Symbol          | l2r             | p_value | adj_p_value |       |
| PGD grade 0-1 versus grade 2 |                  |                 |         |             | hsa_miR_15a_3p  | 1,46           | 0,046   | 0,94            | hsa_let_7a_5p   | -3,84           | 0,01    | 0,88        |       |
|                              |                  |                 |         |             | hsa_miR_18a_5p  | 1,96           | 0,04    | 0,94            | hsa_miR_101_3p  | -1,48           | 0,046   | 0,88        |       |
|                              |                  |                 |         |             | hsa_miR_192_5p  | 1,57           | 0,037   | 0,94            | hsa_miR_135a_5p | -1,48           | 0,037   | 0,88        |       |
|                              |                  |                 |         |             | hsa_miR_194_5p  | 2,16           | 0,0012  | 0,39            | hsa_miR_146b_3p | -1,64           | 0,018   | 0,88        |       |
|                              |                  |                 |         |             | hsa_miR_29c_5p  | 1,69           | 0,045   | 0,94            | hsa_miR_190b    | -5,93           | 0,048   | 0,88        |       |
|                              |                  |                 |         |             | hsa_miR_424_5p  | 1,61           | 0,047   | 0,94            | hsa_miR_19a_3p  | -1,71           | 0,032   | 0,88        |       |
|                              |                  |                 |         |             | hsa_miR_505_3p  | 2,30           | 0,0054  | 0,87            | hsa_miR_204_5p  | -1,30           | 0,038   | 0,88        |       |
|                              |                  |                 |         |             | hsa_miR_590_3p  | 1,51           | 0,023   | 0,94            | hsa_miR_362_5p  | -1,90           | 0,0015  | 0,88        |       |
|                              |                  |                 |         |             |                 |                |         | hsa_miR_374a_5p | -1,90           | 0,038           | 0,88    |             |       |
|                              |                  |                 |         |             |                 |                |         | hsa_miR_623     | 1,13            | 0,024           | 0,88    |             |       |
|                              |                  |                 |         |             |                 |                |         | hsa_miR_628_5p  | -1,20           | 0,048           | 0,88    |             |       |
| best FEV1>80%                | hsa_let_7b_5p    | -1,46           | 0,0385  | 0,8792      | hsa_let_7a_5p   | 4,66           | 0,0308  | 0,3484          | hsa_miR_1260a   | 4,82            | 0,042   | 0,955       |       |
|                              | hsa_miR_1226_5p  | -2,48           | 0,0440  | 0,8792      | hsa_let_7d_5p   | 2,04           | 0,0308  | 0,3484          | hsa_miR_30d_5p  | -1,64           | 0,028   | 0,955       |       |
|                              | hsa_miR_125a_3p  | -2,13           | 0,0253  | 0,8792      | hsa_let_7g_5p   | 1,60           | 0,0110  | 0,3484          | hsa_miR_489_3p  | -1,86           | 0,021   | 0,955       |       |
|                              | hsa_miR_126_5p   | 1,75            | 0,0429  | 0,8792      | hsa_miR_103a_3p | 3,11           | 0,0286  | 0,3484          | hsa_miR_502_3p  | -1,62           | 0,028   | 0,955       |       |
|                              | hsa_miR_29c_5p   | -2,08           | 0,0396  | 0,8792      | hsa_miR_10a_5p  | 2,60           | 0,0044  | 0,3484          |                 |                 |         |             |       |
|                              | hsa_miR_381_3p   | 1,40            | 0,0418  | 0,8792      | hsa_miR_130a_3p | 2,14           | 0,0407  | 0,3484          |                 |                 |         |             |       |
|                              | hsa_miR_505_5p   | -2,36           | 0,0220  | 0,8792      | hsa_miR_146b_3p | 2,76           | 0,0385  | 0,3484          |                 |                 |         |             |       |
|                              | hsa_miR_629_3p   | -2,49           | 0,0099  | 0,8792      | hsa_miR_146b_5p | 2,45           | 0,0132  | 0,3484          |                 |                 |         |             |       |
|                              | hsa_miR_886_3p   | -3,26           | 0,0407  | 0,8792      | hsa_miR_151a_3p | 2,99           | 0,0011  | 0,1161          |                 |                 |         |             |       |
|                              | hsa_miR_886_5p   | -3,71           | 0,0165  | 0,8792      | hsa_miR_151a_5p | 2,54           | 0,0121  | 0,3484          |                 |                 |         |             |       |
|                              | hsa_miR_92a_1_5p | -1,60           | 0,0319  | 0,8792      | hsa_miR_181a_5p | 2,70           | 0,0462  | 0,3484          |                 |                 |         |             |       |
|                              | hsa_miR_942_5p   | -2,02           | 0,0165  | 0,8792      | hsa_miR_193b_3p | 2,07           | 0,0440  | 0,3484          |                 |                 |         |             |       |
|                              |                  |                 |         |             | hsa_miR_203a_3p | 2,94           | 0,0374  | 0,3484          |                 |                 |         |             |       |
|                              |                  |                 |         |             | hsa_miR_224_5p  | 3,45           | 0,0220  | 0,3484          |                 |                 |         |             |       |
|                              |                  |                 |         |             | hsa_miR_26a_5p  | 1,52           | 0,0495  | 0,3484          |                 |                 |         |             |       |
|                              |                  |                 |         |             | hsa_miR_27b_3p  | 3,43           | 0,0077  | 0,3484          |                 |                 |         |             |       |
|                              |                  |                 |         |             | hsa_miR_29b_3p  | 2,26           | 0,0165  | 0,3484          |                 |                 |         |             |       |
|                              |                  |                 |         |             | hsa_miR_30a_3p  | 2,09           | 0,0011  | 0,1161          |                 |                 |         |             |       |
|                              |                  |                 |         |             | hsa_miR_30a_5p  | 2,80           | 0,0088  | 0,3484          |                 |                 |         |             |       |
|                              |                  |                 |         |             | hsa_miR_30b_5p  | 2,07           | 0,0275  | 0,3484          |                 |                 |         |             |       |
|                              |                  |                 |         |             | hsa_miR_30d_5p  | 3,37           | 0,0099  | 0,3484          |                 |                 |         |             |       |
|                              |                  |                 |         |             | hsa_miR_30e_3p  | 1,45           | 0,0462  | 0,3484          |                 |                 |         |             |       |
|                              |                  |                 |         |             | hsa_miR_31_3p   | 3,31           | 0,0253  | 0,3484          |                 |                 |         |             |       |
|                              |                  |                 |         |             | hsa_miR_320a    | 1,39           | 0,0440  | 0,3484          |                 |                 |         |             |       |
|                              |                  |                 |         |             | hsa_miR_324_3p  | 2,77           | 0,0286  | 0,3484          |                 |                 |         |             |       |
|                              |                  |                 |         |             | hsa_miR_324_5p  | 2,62           | 0,0341  | 0,3484          |                 |                 |         |             |       |
|                              |                  |                 |         |             | hsa_miR_342_3p  | 2,05           | 0,0264  | 0,3484          |                 |                 |         |             |       |
|                              |                  |                 |         |             | hsa_miR_362_5p  | 1,83           | 0,0396  | 0,3484          |                 |                 |         |             |       |
|                              |                  |                 |         |             | hsa_miR_429     | 2,23           | 0,0275  | 0,3484          |                 |                 |         |             |       |
|                              |                  |                 |         |             | hsa_miR_500a_5p | 2,83           | 0,0011  | 0,1161          |                 |                 |         |             |       |
|                              |                  |                 |         |             | hsa_miR_518f_3p | -2,33          | 0,0374  | 0,3484          |                 |                 |         |             |       |
|                              |                  |                 |         |             | hsa_miR_520d_3p | -2,43          | 0,0495  | 0,3484          |                 |                 |         |             |       |
|                              |                  |                 |         |             | hsa_miR_523_3p  | -2,51          | 0,0330  | 0,3484          |                 |                 |         |             |       |
|                              |                  |                 |         |             | hsa_miR_532_3p  | 2,42           | 0,0165  | 0,3484          |                 |                 |         |             |       |
|                              |                  |                 |         |             | hsa_miR_532_5p  | 3,21           | 0,0363  | 0,3484          |                 |                 |         |             |       |
|                              |                  |                 |         |             | hsa_miR_591     | -2,73          | 0,0418  | 0,3484          |                 |                 |         |             |       |
|                              |                  |                 |         |             | hsa_miR_636     | -2,71          | 0,0429  | 0,3484          |                 |                 |         |             |       |
|                              |                  |                 |         |             | hsa_miR_660_5p  | 2,50           | 0,0473  | 0,3484          |                 |                 |         |             |       |
|                              |                  |                 |         |             | hsa_miR_770_5p  | -2,84          | 0,0363  | 0,3484          |                 |                 |         |             |       |
|                              |                  |                 |         |             | hsa_miR_95_3p   | 2,23           | 0,0231  | 0,3484          |                 |                 |         |             |       |
|                              | Clinical AR      | hsa_miR_126_3p  | -3,01   | 0,0176      | 0,6193          | hsa_miR_145_3p | 1,24    | 0,0249          | 0,9953          | hsa_miR_449a    | -2,77   | 0,030       | 0,952 |
|                              |                  | hsa_miR_146a_5p | -2,06   | 0,0322      | 0,6193          | hsa_miR_155_5p | -1,52   | 0,0484          | 0,9953          | hsa_miR_520d_3p | 2,37    | 0,030       | 0,952 |
| hsa_miR_16_1_3p              |                  | 1,71            | 0,0308  | 0,6193      | hsa_miR_330_3p  | -1,20          | 0,0322  | 0,9953          |                 |                 |         |             |       |
| hsa_miR_183_5p               |                  | 1,52            | 0,0029  | 0,4645      |                 |                |         |                 |                 |                 |         |             |       |
| hsa_miR_193b_3p              |                  | -3,05           | 0,0059  | 0,4645      |                 |                |         |                 |                 |                 |         |             |       |
| hsa_miR_200c_3p              |                  | -2,41           | 0,0322  | 0,6193      |                 |                |         |                 |                 |                 |         |             |       |
| hsa_miR_23a_5p               |                  | 1,93            | 0,0059  | 0,4645      |                 |                |         |                 |                 |                 |         |             |       |
| hsa_miR_30a_5p               |                  | -2,55           | 0,0410  | 0,6298      |                 |                |         |                 |                 |                 |         |             |       |
| hsa_miR_30d_5p               |                  | -3,11           | 0,0293  | 0,6193      |                 |                |         |                 |                 |                 |         |             |       |
| hsa_miR_31_5p                |                  | -3,39           | 0,0352  | 0,6193      |                 |                |         |                 |                 |                 |         |             |       |
| hsa_miR_345_5p               |                  | -1,95           | 0,0425  | 0,6298      |                 |                |         |                 |                 |                 |         |             |       |
| hsa_miR_450a_5p              |                  | 1,77            | 0,0029  | 0,4645      |                 |                |         |                 |                 |                 |         |             |       |
| hsa_miR_520c_3p              |                  | 1,59            | 0,0249  | 0,6193      |                 |                |         |                 |                 |                 |         |             |       |
| hsa_miR_523_3p               |                  | 1,29            | 0,0103  | 0,5419      |                 |                |         |                 |                 |                 |         |             |       |
| hsa_miR_532_3p               |                  | -1,65           | 0,0147  | 0,6193      |                 |                |         |                 |                 |                 |         |             |       |
| hsa_miR_551b_5p              |                  | 1,24            | 0,0176  | 0,6193      |                 |                |         |                 |                 |                 |         |             |       |
| hsa_miR_574_3p               | -2,57            | 0,0088          | 0,5419  |             |                 |                |         |                 |                 |                 |         |             |       |
| hsa_miR_629_5p               | 1,67             | 0,0337          | 0,6193  |             |                 |                |         |                 |                 |                 |         |             |       |
| pneumonia                    | hsa_miR_145_3p   | 1,39            | 0,0396  | 0,9554      | hsa_miR_10a_5p  | -2,03          | 0,033   | 0,928           | hsa_miR_137     | 1,72            | 0,04196 | 0,72471759  |       |
|                              | hsa_miR_22_3p    | 2,55            | 0,0154  | 0,9554      | hsa_miR_125a_3p | -1,62          | 0,010   | 0,928           | hsa_miR_1825    | 6,85            | 0,04895 | 0,72471759  |       |
|                              | hsa_miR_452_5p   | 2,35            | 0,0022  | 0,3484      | hsa_miR_1270    | 2,08           | 0,032   | 0,928           | hsa_miR_200a_3p | -4,30           | 0,04895 | 0,72471759  |       |
|                              | hsa_miR_505_3p   | 1,92            | 0,0429  | 0,9554      | hsa_miR_141_5p  | 1,33           | 0,046   | 0,928           | hsa_miR_301a_3p | -1,50           | 0,02098 | 0,72471759  |       |
|                              | hsa_miR_548i     | 2,05            | 0,0022  | 0,3484      | hsa_miR_148b_5p | 1,65           | 0,022   | 0,928           | hsa_miR_34a_3p  | -2,06           | 0,04196 | 0,72471759  |       |
|                              | hsa_miR_590_5p   | 2,47            | 0,0484  | 0,9554      | hsa_miR_155_5p  | -1,61          | 0,027   | 0,928           | hsa_miR_451a    | -4,35           | 0,04196 | 0,72471759  |       |
|                              | hsa_miR_7_5p     | 2,21            | 0,0330  | 0,9554      | hsa_miR_16_1_3p | 1,41           | 0,047   | 0,928           | hsa_miR_484     | -1,47           | 0,03497 | 0,72471759  |       |
|                              |                  |                 |         |             | hsa_miR_539_5p  | 2,27           | 0,010   | 0,928           | hsa_miR_590_5p  | -1,51           | 0,01399 | 0,72471759  |       |
|                              |                  |                 |         |             | hsa_miR_550a_5p | 1,45           | 0,037   | 0,928           | hsa_miR_597_5p  | 1,48            | 0,00699 | 0,72471759  |       |
|                              |                  |                 |         |             | hsa_miR_886_5p  | -2,74          | 0,031   | 0,928           | hsa_miR_875_5p  | 1,40            | 0,02797 | 0,72471759  |       |
|                              |                  |                 |         |             | hsa_miR_9_3p    | 1,39           | 0,018   | 0,928           |                 |                 |         |             |       |

|                                       |                |       |        |        |
|---------------------------------------|----------------|-------|--------|--------|
| presence of INFECTION @BAL withdrawal | hsa_miR_628_5p | 2,06  | 0,0286 | 0,9390 |
|                                       | hsa_miR_629_5p | -1,80 | 0,0319 | 0,9390 |
|                                       | hsa_miR_92a_3p | -1,39 | 0,0385 | 0,9390 |
|                                       |                |       |        |        |

|                 |       |       |       |
|-----------------|-------|-------|-------|
| hsa_miR_1233_3p | 4,87  | 0,038 | 0,557 |
| hsa_miR_126_3p  | 1,86  | 0,048 | 0,557 |
| hsa_miR_132_3p  | 3,39  | 0,034 | 0,557 |
| hsa_miR_140_5p  | 2,15  | 0,041 | 0,557 |
| hsa_miR_146a_5p | 3,05  | 0,020 | 0,557 |
| hsa_miR_148b_5p | -1,53 | 0,036 | 0,557 |
| hsa_miR_211_5p  | -2,11 | 0,001 | 0,348 |
| hsa_miR_223_3p  | 3,96  | 0,029 | 0,557 |
| hsa_miR_337_5p  | -2,16 | 0,045 | 0,557 |
| hsa_miR_449b_5p | 2,18  | 0,047 | 0,557 |
| hsa_miR_551b_3p | -1,96 | 0,027 | 0,557 |
| hsa_miR_576_3p  | -1,18 | 0,026 | 0,557 |
| hsa_miR_604     | -2,31 | 0,034 | 0,557 |
| hsa_miR_708_5p  | 1,93  | 0,018 | 0,557 |
| hsa_miR_875_5p  | -2,19 | 0,013 | 0,557 |
| hsa_miR_9_5p    | -1,31 | 0,029 | 0,557 |

|                 |       |         |             |
|-----------------|-------|---------|-------------|
| hsa_miR_1226_5p | -1,23 | 0,00311 | 0,246309246 |
| hsa_miR_1244    | -1,18 | 0,00777 | 0,328412328 |
| hsa_miR_135b_5p | 1,35  | 0,04662 | 0,388909336 |
| hsa_miR_140_3p  | -1,06 | 0,00311 | 0,246309246 |
| hsa_miR_142_5p  | -1,24 | 0,00622 | 0,328412328 |
| hsa_miR_152_3p  | 1,81  | 0,03574 | 0,377674178 |
| hsa_miR_15a_5p  | -1,32 | 0,02176 | 0,328412328 |
| hsa_miR_16_1_3p | -1,16 | 0,01865 | 0,328412328 |
| hsa_miR_1825    | -3,87 | 0,03108 | 0,351870352 |
| hsa_miR_18a_5p  | -1,26 | 0,02176 | 0,328412328 |
| hsa_miR_191_3p  | -1,14 | 0,00311 | 0,246309246 |
| hsa_miR_193b_3p | 2,22  | 0,04662 | 0,388909336 |
| hsa_miR_20b_5p  | 2,50  | 0,04351 | 0,388909336 |
| hsa_miR_21_3p   | -2,24 | 0,00622 | 0,328412328 |
| hsa_miR_212_3p  | -2,00 | 0,01709 | 0,328412328 |
| hsa_miR_23a_3p  | -1,04 | 0,02176 | 0,328412328 |
| hsa_miR_30d_3p  | -1,01 | 0,02176 | 0,328412328 |
| hsa_miR_339_5p  | -1,22 | 0,02176 | 0,328412328 |
| hsa_miR_342_5p  | -1,07 | 0,02176 | 0,328412328 |
| hsa_miR_424_5p  | -1,03 | 0,02176 | 0,328412328 |
| hsa_miR_425_5p  | -1,72 | 0,00311 | 0,246309246 |
| hsa_miR_494_3p  | -1,54 | 0,01709 | 0,328412328 |
| hsa_miR_618     | -1,16 | 0,03263 | 0,356723736 |
| hsa_miR_622     | -1,09 | 0,03108 | 0,351870352 |
| hsa_miR_629_5p  | -1,14 | 0,02797 | 0,351870352 |
| hsa_miR_98_5p   | -1,60 | 0,02176 | 0,328412328 |
| hsa_miR_99b_5p  | 1,99  | 0,04507 | 0,388909336 |



**Table S8.** Repeated measures nonparametric ANOVA corrected for multiple comparison was used to identify BAL-miRNAs whose variation over times (T0-T1-T2) was significantly different in patients who experienced (yes) or not (no) pneumonia or clinical AR (c-AR). Data are reported as median with interquartile range (IQR). The columns labeled with "Yes" identify the miRNAs values in patients who experienced the event. The

|                  | Mirna NAME      | adj_p.value | median with IQR    |                   |                    |                  |                   |                    |
|------------------|-----------------|-------------|--------------------|-------------------|--------------------|------------------|-------------------|--------------------|
|                  |                 |             | NO-T0              | YES-T0            | NO-T1              | YES-T1           | NO-T2             | YES-T2             |
| <b>PNEUMONIA</b> | hsa_miR_23b_3p  | 1,61E+07    | -2.0691; 2.1371    | -3.4341; 0.379975 | -1.1711; 4.7412    | -3.4532; 0.8794  | -1.42385; 1.0084  | -0.63495; 0.867725 |
| <b>c-AR</b>      | hsa_miR_22_5p   | 2,911E+02   | -1.150775; 0.70265 | 0.91445; 0.3496   | 0.08075; 2.21075   | -2.14435; 1.2608 | -1.42385; 1.0084  | -0.4481; 0.3737    |
|                  | hsa_miR_29c_5p  | 4,357E+07   | -1.370475; 0.9614  | 1.45025; 4.1192   | -0.17475; 2.0429   | -1.8832; 0.7385  | -1.0447; 0.4063   | 0.0716; 1.4131     |
|                  | hsa_miR_181a_3p | 3,111E+08   | -2.0691; 1.24865   | 0.7368; 2.9741    | -0.19385; 2.5639   | -2.14435; 1.2608 | -1.574925; 1.0386 | -0.50295; 0.264    |
|                  | hsa_miR_362_3p  | 5,557E+09   | -1.156725; 1.2083  | -1.64165; 0.6788  | -0.731675; 1.41875 | -1.98475; 0.9416 | -1.22765; 0.70845 | -0.0438; 1.1823    |
|                  | hsa_let_7f_5p   | 0,00199     | -1.9354; 1.5966    | 1.71015; 1.7962   | -1.3754; 5.2741    | -2.14435; 1.2608 | -1.42385; 1.0084  | 2.48815; 6.2462    |
|                  | hsa_miR_339_3p  | 0,00490     | 0.3258; 2.21845    | 3.0407; 6.0611    | 1.008225; 3.17765  | -1.12155; 3.3064 | -1.02965; 0.9668  | 0.4698; 2.2095     |
|                  | hsa_miR_146b_3p | 0,00612     | -0.35875; 3.1401   | 2.3386; 2.0845    | -0.190225; 3.82575 | -1.5523; 0.0767  | -0.9913; 1.7339   | 1.2057; 3.6813     |
|                  | hsa_miR_452_5p  | 0,02073     | -1.370475; 1.9507  | -3.4126; 0.5379   | -0.9892; 2.9546    | -2.14435; 1.2608 | -1.42385; 1.0084  | -0.12475; 1.0204   |
|                  | hsa_miR_571     | 0,02073     | -1.023525; 2.3406  | -0.47815; 3.0604  | -1.642525; 3.14585 | 0.55415; 4.1362  | 0.667425; 2.3447  | -0.57525; 5.0576   |

**Table S9.** Previously validate targets of c-AR-associated BAL-miRNAs (see Suppl. Table 8) were searched using the miRTargetlink Human web tool.

| <b>miRNA</b>    | <b>Target_Gene</b> | <b>Evidence</b> |
|-----------------|--------------------|-----------------|
| hsa-let-7f-5p   | MEF2D              | weak            |
| hsa-let-7f-5p   | SP1                | weak            |
| hsa-let-7f-5p   | ZNF280B            | weak            |
| hsa-let-7f-5p   | ATP2A2             | weak            |
| hsa-let-7f-5p   | PDGFB              | weak            |
| hsa-let-7f-5p   | DYRK2              | strong          |
| hsa-let-7f-5p   | IGF1R              | weak            |
| hsa-let-7f-5p   | BACH1              | weak            |
| hsa-let-7f-5p   | GRPEL2             | weak            |
| hsa-let-7f-5p   | NCOA3              | weak            |
| hsa-let-7f-5p   | MAPK6              | weak            |
| hsa-let-7f-5p   | C5ORF51            | weak            |
| hsa-let-7f-5p   | ZNF264             | weak            |
| hsa-let-7f-5p   | YAE1D1             | weak            |
| hsa-let-7f-5p   | TSC22D2            | weak            |
| hsa-let-7f-5p   | SMCR7L             | weak            |
| hsa-let-7f-5p   | KLHDC8B            | weak            |
| hsa-let-7f-5p   | KCTD21             | weak            |
| hsa-let-7f-5p   | ATXN7L3B           | weak            |
| hsa-let-7f-5p   | PMAIP1             | weak            |
| hsa-let-7f-5p   | SEMA4C             | weak            |
| hsa-let-7f-5p   | CEP135             | weak            |
| hsa-let-7f-5p   | RDX                | weak            |
| hsa-let-7f-5p   | SOD2               | weak            |
| hsa-let-7f-5p   | WASL               | weak            |
| hsa-let-7f-5p   | EPHA4              | weak            |
| hsa-let-7f-5p   | DUSP1              | weak            |
| hsa-let-7f-5p   | DNAL1              | weak            |
| hsa-let-7f-5p   | CCNT2              | weak            |
| hsa-let-7f-5p   | PLEKHA3            | weak            |
| hsa-let-7f-5p   | BRI3BP             | weak            |
| hsa-let-7f-5p   | MTX3               | weak            |
| hsa-let-7f-5p   | CPA4               | weak            |
| hsa-let-7f-5p   | ZNF799             | weak            |
| hsa-miR-146b-3p | PDGFB              | weak            |
| hsa-miR-146b-3p | C5ORF51            | weak            |
| hsa-miR-146b-3p | TSC22D2            | weak            |
| hsa-miR-146b-3p | NUFIP2             | weak            |
| hsa-miR-146b-3p | KLHDC8B            | weak            |
| hsa-miR-146b-3p | KCTD21             | weak            |
| hsa-miR-146b-3p | ATXN1              | weak            |
| hsa-miR-146b-3p | ZNF551             | weak            |
| hsa-miR-146b-3p | CBX2               | weak            |
| hsa-miR-22-5p   | SMCR7L             | weak            |
| hsa-miR-22-5p   | PMAIP1             | weak            |
| hsa-miR-22-5p   | CCNT2              | weak            |
| hsa-miR-22-5p   | EPHA4              | weak            |
| hsa-miR-22-5p   | DUSP1              | weak            |

|                |          |      |
|----------------|----------|------|
| hsa-miR-22-5p  | GRPEL2   | weak |
| hsa-miR-22-5p  | GDNF     | weak |
| hsa-miR-22-5p  | B3GALT5  | weak |
| hsa-miR-22-5p  | TAS2R30  | weak |
| hsa-miR-22-5p  | CPA4     | weak |
| hsa-miR-22-5p  | SYNRG    | weak |
| hsa-miR-362-3p | REST     | weak |
| hsa-miR-362-3p | CASD1    | weak |
| hsa-miR-362-3p | BRI3BP   | weak |
| hsa-miR-362-3p | BACH1    | weak |
| hsa-miR-362-3p | DYRK2    | weak |
| hsa-miR-362-3p | IRS1     | weak |
| hsa-miR-362-3p | PLEKHA3  | weak |
| hsa-miR-362-3p | ZNF551   | weak |
| hsa-miR-362-3p | NOTCH2NL | weak |
| hsa-miR-362-3p | DNAL1    | weak |
| hsa-miR-362-3p | TAS2R30  | weak |
| hsa-miR-362-3p | SOD2     | weak |
| hsa-miR-362-3p | MTX3     | weak |
| hsa-miR-362-3p | RDX      | weak |
| hsa-miR-362-3p | CBX2     | weak |
| hsa-miR-362-3p | MAPK6    | weak |
| hsa-miR-362-3p | CEP135   | weak |
| hsa-miR-362-3p | NUFIP2   | weak |
| hsa-miR-362-3p | NCOA3    | weak |
| hsa-miR-362-3p | IGF1R    | weak |
| hsa-miR-362-3p | CDK6     | weak |
| hsa-miR-362-3p | YAE1D1   | weak |
| hsa-miR-362-3p | SEMA4C   | weak |
| hsa-miR-362-3p | ATXN1    | weak |
| hsa-miR-362-3p | B3GALT5  | weak |
| hsa-miR-362-3p | MEF2D    | weak |
| hsa-miR-362-3p | ATP2A2   | weak |
| hsa-miR-362-3p | ATXN7L3B | weak |
| hsa-miR-362-3p | ZNF280B  | weak |
| hsa-miR-362-3p | GDNF     | weak |
| hsa-miR-362-3p | SP1      | weak |
| hsa-miR-362-3p | PDK3     | weak |
| hsa-miR-362-3p | WASL     | weak |
| hsa-miR-362-3p | FAM26E   | weak |
| hsa-miR-362-3p | ZNF264   | weak |
| hsa-miR-362-3p | SYNRG    | weak |
| hsa-miR-452-5p | CDK6     | weak |
| hsa-miR-452-5p | NOTCH2NL | weak |
| hsa-miR-452-5p | CASD1    | weak |
| hsa-miR-452-5p | PDK3     | weak |
| hsa-miR-452-5p | FAM26E   | weak |
| hsa-miR-452-5p | REST     | weak |
| hsa-miR-452-5p | ZNF799   | weak |
| hsa-miR-452-5p | IRS1     | weak |

**Table S10.** Biological processes (GO terms) predicted to be modulated by c-AR-associated miRNAs. Target genes were imported into WebGestalt tool and the GeneOntology-Biological Process functional database was chosen. As reference set, the human protein coding genome was used. Only data with a FDR<0.05 are reported.

| geneSet    | description                                           | link                                                                                                                  | size | overlap | expect    | enrichmen | pValue   | FDR       | overlapId  | database                        |
|------------|-------------------------------------------------------|-----------------------------------------------------------------------------------------------------------------------|------|---------|-----------|-----------|----------|-----------|------------|---------------------------------|
| GO:0036166 | phenotypic switching                                  | <a href="http://amigo.geneontology.org/amigo/term/GO:0036166">http://amigo.geneontology.org/amigo/term/GO:0036166</a> | 7    | 3       | 0,01534   | 195,56757 | 3,37E-07 | 0,0012676 | 5155;6648  | geneontology_Biological_Process |
| GO:1900239 | regulation of phenotypic switching                    | <a href="http://amigo.geneontology.org/amigo/term/GO:1900239">http://amigo.geneontology.org/amigo/term/GO:1900239</a> | 7    | 3       | 0,01534   | 195,56757 | 3,37E-07 | 0,0012676 | 5155;6648  | geneontology_Biological_Process |
| GO:0043696 | dedifferentiation                                     | <a href="http://amigo.geneontology.org/amigo/term/GO:0043696">http://amigo.geneontology.org/amigo/term/GO:0043696</a> | 8    | 3       | 0,0175314 | 171,12162 | 5,38E-07 | 0,0012676 | 1021;5155  | geneontology_Biological_Process |
| GO:0043697 | cell dedifferentiation                                | <a href="http://amigo.geneontology.org/amigo/term/GO:0043697">http://amigo.geneontology.org/amigo/term/GO:0043697</a> | 8    | 3       | 0,0175314 | 171,12162 | 5,38E-07 | 0,0012676 | 1021;5155  | geneontology_Biological_Process |
| GO:0062012 | regulation of small molecule metabolic process        | <a href="http://amigo.geneontology.org/amigo/term/GO:0062012">http://amigo.geneontology.org/amigo/term/GO:0062012</a> | 344  | 7       | 0,7538498 | 9,2856694 | 8,34E-06 | 0,0157101 | 3667;5155  | geneontology_Biological_Process |
| GO:0045913 | positive regulation of carbohydrate metabolic process | <a href="http://amigo.geneontology.org/amigo/term/GO:0045913">http://amigo.geneontology.org/amigo/term/GO:0045913</a> | 77   | 4       | 0,1687396 | 23,70516  | 2,36E-05 | 0,029705  | 3667;5155  | geneontology_Biological_Process |
| GO:0051270 | regulation of cellular component movement             | <a href="http://amigo.geneontology.org/amigo/term/GO:0051270">http://amigo.geneontology.org/amigo/term/GO:0051270</a> | 942  | 10      | 2,0643213 | 4,8442073 | 2,44E-05 | 0,029705  | 488;1021;1 | geneontology_Biological_Process |
| GO:0006109 | regulation of carbohydrate metabolic process          | <a href="http://amigo.geneontology.org/amigo/term/GO:0006109">http://amigo.geneontology.org/amigo/term/GO:0006109</a> | 161  | 5       | 0,3528192 | 14,171563 | 2,52E-05 | 0,029705  | 3667;5155  | geneontology_Biological_Process |
| GO:0090677 | reversible differentiation                            | <a href="http://amigo.geneontology.org/amigo/term/GO:0090677">http://amigo.geneontology.org/amigo/term/GO:0090677</a> | 5    | 2       | 0,0109571 | 182,52973 | 4,65E-05 | 0,0486909 | 5155;6648  | geneontology_Biological_Process |
| GO:0032885 | regulation of polysaccharide biosynthetic process     | <a href="http://amigo.geneontology.org/amigo/term/GO:0032885">http://amigo.geneontology.org/amigo/term/GO:0032885</a> | 35   | 3       | 0,0766998 | 39,113514 | 6,04E-05 | 0,0568924 | 3667;5155  | geneontology_Biological_Process |

**Table S13.** The correlation among clinical variables was analyzed with Fisher's exact test. Only significant association are shown.

| <b>VARIABLE 1</b>          | <b>VARIABLE 2</b>   | <b>P VAL</b> | <b>Statistical test</b> |
|----------------------------|---------------------|--------------|-------------------------|
| LAS>40                     | ECMO                | 0,018        | Fisher's exact          |
| MP                         | DCD                 | 0,028        | Fisher's exact          |
| Oto score>5                | MP                  | 0,0015       | Fisher's exact          |
| Disease                    | Histological AR max | 0,04         | chi square              |
| Mechanical ventilation >2d | Age >50y            | 0,024        | Fisher's exact          |

LAS, Lung allocation score; MP, machine perfusion; PGD, primary graft dysfunction

**Table S12.** Cox-regression analysis was performed to identify T0-BAL or T1-BAL miRNAs associated with clinical AR risk. P values were corrected for multiple comparison applying the FDR method (pv.adj).

| T0-BAL                 |              |              |       | T1-BAL                 |              |              |       |
|------------------------|--------------|--------------|-------|------------------------|--------------|--------------|-------|
| miRNA                  | pval (Cox)   | pv.adj       | HR    | miRNA                  | pval (Cox)   | pv.adj       | HR    |
| <b>hsa_miR_744_3p</b>  | <b>0,020</b> | <b>0,998</b> | 2,743 | <b>hsa_miR_1285_3p</b> | <b>0,048</b> | <b>0,998</b> | 1,541 |
| <b>hsa_miR_222_5p</b>  | <b>0,032</b> | <b>0,998</b> | 1,677 | hsa_miR_342_5p         | 0,069        | 0,998        | 0,485 |
| <b>hsa_miR_148b_5p</b> | <b>0,035</b> | <b>0,998</b> | 0,312 | hsa_miR_505_3p         | 0,075        | 0,998        | 0,616 |
| <b>hsa_miR_27a_5p</b>  | <b>0,047</b> | <b>0,998</b> | 1,869 | hsa_miR_335_5p         | 0,092        | 0,998        | 0,576 |
| hsa_miR_455_5p         | 0,064        | 0,998        | 0,315 | hsa_miR_590_3p         | 0,095        | 0,998        | 0,551 |
| hsa_miR_375            | 0,065        | 0,998        | 0,640 | hsa_miR_1233_3p        | 0,099        | 0,998        | 1,262 |
| hsa_miR_138_5p         | 0,066        | 0,998        | 0,628 | hsa_miR_886_5p         | 0,103        | 0,998        | 1,495 |
| hsa_miR_187_3p         | 0,072        | 0,998        | 1,478 | hsa_miR_605_5p         | 0,103        | 0,998        | 1,334 |
| hsa_miR_664a_3p        | 0,080        | 0,998        | 1,279 | hsa_miR_362_3p         | 0,104        | 0,998        | 0,508 |
| hsa_miR_628_5p         | 0,080        | 0,998        | 1,577 | hsa_miR_576_3p         | 0,104        | 0,998        | 0,555 |
| hsa_miR_181a_3p        | 0,081        | 0,998        | 1,763 | hsa_miR_1247_5p        | 0,116        | 0,998        | 1,242 |
| hsa_miR_29c_5p         | 0,084        | 0,998        | 1,576 | hsa_miR_31_3p          | 0,122        | 0,998        | 0,744 |
| hsa_miR_548i           | 0,087        | 0,998        | 0,381 | hsa_miR_330_3p         | 0,126        | 0,998        | 0,546 |
| hsa_miR_1254           | 0,090        | 0,998        | 1,623 | hsa_miR_511_5p         | 0,128        | 0,998        | 0,730 |
| hsa_miR_452_5p         | 0,092        | 0,998        | 0,400 | hsa_miR_19b_1_5p       | 0,133        | 0,998        | 2,017 |
| hsa_miR_523_3p         | 0,093        | 0,998        | 0,327 | hsa_miR_380_5p         | 0,133        | 0,998        | 1,450 |
| hsa_miR_485_3p         | 0,097        | 0,998        | 0,361 | hsa_miR_551b_3p        | 0,134        | 0,998        | 0,582 |
| hsa_miR_22_3p          | 0,097        | 0,998        | 0,342 | hsa_miR_1271_5p        | 0,135        | 0,998        | 0,618 |
| hsa_miR_579_3p         | 0,098        | 0,998        | 0,489 | hsa_miR_1276           | 0,136        | 0,998        | 1,454 |
| hsa_miR_16_1_3p        | 0,100        | 0,998        | 0,496 | hsa_let_7e_5p          | 0,137        | 0,998        | 0,790 |
| hsa_miR_671_3p         | 0,103        | 0,998        | 1,584 | hsa_miR_638            | 0,139        | 0,998        | 1,413 |
| hsa_miR_520c_3p        | 0,104        | 0,998        | 0,363 | hsa_miR_502_3p         | 0,149        | 0,998        | 0,654 |
| hsa_let_7c_5p          | 0,106        | 0,998        | 0,537 | hsa_miR_520d_3p        | 0,152        | 0,998        | 1,436 |
| hsa_miR_190a_5p        | 0,109        | 0,998        | 0,380 | hsa_miR_1255b_5p       | 0,161        | 0,998        | 1,379 |
| hsa_miR_628_3p         | 0,110        | 0,998        | 1,421 | hsa_miR_1227_3p        | 0,162        | 0,998        | 1,303 |
| hsa_let_7f_5p          | 0,116        | 0,998        | 1,455 | hsa_miR_190b           | 0,167        | 0,998        | 0,737 |
| hsa_miR_942_5p         | 0,117        | 0,998        | 1,559 | hsa_miR_708_5p         | 0,171        | 0,998        | 1,930 |
| hsa_miR_337_5p         | 0,121        | 0,998        | 0,379 | hsa_miR_181a_3p        | 0,176        | 0,998        | 0,680 |
| hsa_miR_210_3p         | 0,123        | 0,998        | 1,315 | hsa_miR_454_3p         | 0,179        | 0,998        | 1,495 |
| hsa_miR_141_3p         | 0,126        | 0,998        | 0,789 | hsa_miR_1290           | 0,183        | 0,998        | 1,578 |
| hsa_miR_576_3p         | 0,127        | 0,998        | 0,466 | hsa_miR_151a_5p        | 0,184        | 0,998        | 0,703 |
| hsa_miR_106b_3p        | 0,134        | 0,998        | 1,365 | hsa_miR_1262           | 0,190        | 0,998        | 1,553 |
| hsa_miR_34c_5p         | 0,136        | 0,998        | 0,798 | hsa_miR_362_5p         | 0,191        | 0,998        | 0,617 |
| hsa_miR_10a_5p         | 0,137        | 0,998        | 1,396 | hsa_miR_1303           | 0,195        | 0,998        | 1,280 |
| hsa_miR_450a_5p        | 0,139        | 0,998        | 0,346 | hsa_miR_15a_5p         | 0,196        | 0,998        | 1,303 |
| hsa_miR_551b_5p        | 0,144        | 0,998        | 0,393 | hsa_miR_146b_3p        | 0,198        | 0,998        | 0,760 |
| hsa_miR_133a_3p        | 0,155        | 0,998        | 1,517 | hsa_miR_452_5p         | 0,199        | 0,998        | 0,660 |
| hsa_miR_1226_5p        | 0,161        | 0,998        | 1,405 | hsa_miR_516b_3p        | 0,204        | 0,998        | 1,345 |
| hsa_miR_21_3p          | 0,163        | 0,998        | 1,251 | hsa_miR_23a_3p         | 0,208        | 0,998        | 0,760 |
| hsa_miR_604            | 0,163        | 0,998        | 1,971 | hsa_miR_1226_5p        | 0,215        | 0,998        | 0,657 |
| hsa_miR_141_5p         | 0,164        | 0,998        | 0,562 | hsa_miR_628_5p         | 0,218        | 0,998        | 1,858 |
| hsa_miR_206            | 0,167        | 0,998        | 0,615 | hsa_miR_30d_3p         | 0,219        | 0,998        | 1,559 |
| hsa_miR_135a_5p        | 0,173        | 0,998        | 0,463 | hsa_miR_194_5p         | 0,220        | 0,998        | 0,613 |
| hsa_miR_770_5p         | 0,177        | 0,998        | 0,401 | hsa_miR_766_3p         | 0,221        | 0,998        | 0,831 |
| hsa_miR_638            | 0,177        | 0,998        | 1,464 | hsa_miR_133a_3p        | 0,222        | 0,998        | 0,804 |
| hsa_miR_1285_3p        | 0,177        | 0,998        | 1,286 | hsa_miR_512_3p         | 0,223        | 0,998        | 1,238 |
| hsa_miR_29a_5p         | 0,178        | 0,998        | 0,432 | hsa_miR_200a_3p        | 0,224        | 0,998        | 0,816 |
| hsa_miR_500a_5p        | 0,179        | 0,998        | 1,520 | hsa_miR_148b_3p        | 0,228        | 0,998        | 0,690 |
| hsa_miR_320a           | 0,179        | 0,998        | 1,602 | hsa_miR_671_3p         | 0,229        | 0,998        | 0,641 |
| hsa_miR_449b_5p        | 0,182        | 0,998        | 0,752 | hsa_miR_664a_3p        | 0,240        | 0,998        | 0,825 |
| hsa_miR_331_5p         | 0,188        | 0,998        | 1,636 | hsa_miR_34b_5p         | 0,249        | 0,998        | 0,750 |
| hsa_miR_202_3p         | 0,190        | 0,998        | 0,646 | hsa_miR_146a_5p        | 0,257        | 0,998        | 1,311 |
| hsa_miR_197_3p         | 0,194        | 0,998        | 0,578 | hsa_miR_29c_5p         | 0,259        | 0,998        | 0,722 |
| hsa_miR_629_5p         | 0,197        | 0,998        | 0,564 | hsa_miR_1180_3p        | 0,260        | 0,998        | 0,801 |
| hsa_miR_184            | 0,208        | 0,998        | 1,567 | hsa_miR_34c_5p         | 0,268        | 0,998        | 0,835 |
| hsa_miR_29b_2_5p       | 0,211        | 0,998        | 2,240 | hsa_miR_18a_5p         | 0,275        | 0,998        | 0,759 |
| hsa_miR_23a_5p         | 0,216        | 0,998        | 0,529 | hsa_miR_1183           | 0,278        | 0,998        | 1,256 |
| hsa_miR_204_5p         | 0,216        | 0,998        | 0,549 | hsa_miR_223_5p         | 0,280        | 0,998        | 1,243 |
| hsa_miR_512_3p         | 0,217        | 0,998        | 0,601 | hsa_miR_601            | 0,284        | 0,998        | 1,377 |
| hsa_miR_340_3p         | 0,230        | 0,998        | 1,437 | hsa_let_7g_5p          | 0,285        | 0,998        | 0,589 |
| hsa_miR_200a_3p        | 0,237        | 0,998        | 0,849 | hsa_miR_449b_5p        | 0,288        | 0,998        | 1,331 |
| hsa_miR_15a_5p         | 0,239        | 0,998        | 1,385 | hsa_miR_1254           | 0,292        | 0,998        | 1,215 |
| hsa_miR_1291           | 0,243        | 0,998        | 1,265 | hsa_miR_125a_3p        | 0,300        | 0,998        | 0,721 |
| hsa_miR_601            | 0,244        | 0,998        | 1,457 | hsa_miR_27b_3p         | 0,300        | 0,998        | 0,828 |
| hsa_miR_1271_5p        | 0,244        | 0,998        | 1,452 | hsa_miR_449a           | 0,302        | 0,998        | 1,226 |
| hsa_miR_429            | 0,245        | 0,998        | 0,747 | hsa_miR_181c_5p        | 0,310        | 0,998        | 0,658 |
| hsa_miR_589_5p         | 0,249        | 0,998        | 0,436 | hsa_miR_197_3p         | 0,310        | 0,998        | 1,265 |
| hsa_miR_323a_3p        | 0,251        | 0,998        | 0,572 | hsa_miR_7_1_3p         | 0,317        | 0,998        | 0,828 |
| hsa_miR_34a_5p         | 0,256        | 0,998        | 0,839 | hsa_miR_222_3p         | 0,317        | 0,998        | 1,219 |
| hsa_miR_1290           | 0,263        | 0,998        | 1,346 | hsa_miR_204_5p         | 0,317        | 0,998        | 0,691 |
| hsa_miR_93_3p          | 0,266        | 0,998        | 1,363 | hsa_miR_24_3p          | 0,321        | 0,998        | 1,259 |
| hsa_miR_886_3p         | 0,268        | 0,998        | 1,177 | hsa_miR_185_5p         | 0,322        | 0,998        | 0,833 |
| hsa_miR_598_3p         | 0,270        | 0,998        | 1,420 | hsa_miR_130a_3p        | 0,325        | 0,998        | 0,771 |
| hsa_miR_342_5p         | 0,271        | 0,998        | 1,422 | hsa_miR_485_3p         | 0,328        | 0,998        | 1,532 |

|                  |       |       |       |                   |       |       |       |
|------------------|-------|-------|-------|-------------------|-------|-------|-------|
| hsa_miR_203a_3p  | 0,273 | 0,998 | 0,857 | hsa_miR_338_5p    | 0,333 | 0,998 | 1,164 |
| hsa_miR_545_3p   | 0,276 | 0,998 | 0,647 | hsa_miR_17_5p     | 0,335 | 0,998 | 1,330 |
| hsa_miR_205_5p   | 0,287 | 0,998 | 0,809 | hsa_miR_650       | 0,338 | 0,998 | 1,216 |
| hsa_miR_140_3p   | 0,287 | 0,998 | 1,431 | hsa_miR_181a_2_3p | 0,340 | 0,998 | 0,755 |
| hsa_miR_183_5p   | 0,290 | 0,998 | 0,517 | hsa_miR_422a      | 0,346 | 0,998 | 0,807 |
| hsa_miR_148b_3p  | 0,295 | 0,998 | 1,313 | hsa_miR_191_3p    | 0,349 | 0,998 | 0,732 |
| hsa_let_7e_5p    | 0,300 | 0,998 | 0,848 | hsa_miR_16_5p     | 0,350 | 0,998 | 1,263 |
| hsa_miR_223_5p   | 0,303 | 0,998 | 1,296 | hsa_miR_296_5p    | 0,351 | 0,998 | 0,736 |
| hsa_miR_886_5p   | 0,308 | 0,998 | 1,189 | hsa_miR_125a_5p   | 0,355 | 0,998 | 1,196 |
| hsa_miR_29b_3p   | 0,309 | 0,998 | 0,793 | hsa_miR_152_3p    | 0,358 | 0,998 | 0,790 |
| hsa_miR_629_3p   | 0,310 | 0,998 | 1,312 | hsa_miR_770_5p    | 0,358 | 0,998 | 1,173 |
| hsa_miR_9_5p     | 0,314 | 0,998 | 0,649 | hsa_miR_20b_5p    | 0,361 | 0,998 | 1,257 |
| hsa_miR_296_5p   | 0,317 | 0,998 | 0,566 | hsa_miR_591       | 0,363 | 0,998 | 1,193 |
| hsa_miR_422a     | 0,319 | 0,998 | 0,778 | hsa_miR_423_5p    | 0,366 | 0,998 | 0,885 |
| hsa_miR_92a_3p   | 0,324 | 0,998 | 0,791 | hsa_miR_93_5p     | 0,368 | 0,998 | 1,243 |
| hsa_miR_363_3p   | 0,328 | 0,998 | 0,567 | hsa_miR_1267      | 0,380 | 0,998 | 1,228 |
| hsa_miR_590_3p   | 0,331 | 0,998 | 1,327 | hsa_miR_505_5p    | 0,382 | 0,998 | 0,839 |
| hsa_miR_338_5p   | 0,336 | 0,998 | 0,721 | hsa_miR_28_3p     | 0,388 | 0,998 | 1,265 |
| hsa_miR_1260a    | 0,340 | 0,998 | 1,179 | hsa_miR_106a_5p   | 0,395 | 0,998 | 1,252 |
| hsa_miR_7_1_3p   | 0,341 | 0,998 | 1,206 | hsa_miR_518f_3p   | 0,399 | 0,998 | 1,214 |
| hsa_miR_484      | 0,346 | 0,998 | 1,310 | hsa_miR_18a_3p    | 0,401 | 0,998 | 0,678 |
| hsa_miR_1233_3p  | 0,347 | 0,998 | 1,086 | hsa_miR_1208      | 0,403 | 0,998 | 1,207 |
| hsa_miR_145_3p   | 0,350 | 0,998 | 0,610 | hsa_let_7d_5p     | 0,405 | 0,998 | 0,782 |
| hsa_miR_744_5p   | 0,351 | 0,998 | 0,791 | hsa_miR_579_3p    | 0,406 | 0,998 | 0,750 |
| hsa_miR_642a_5p  | 0,354 | 0,998 | 0,833 | hsa_miR_130b_3p   | 0,408 | 0,998 | 0,830 |
| hsa_miR_130a_3p  | 0,355 | 0,998 | 0,695 | hsa_miR_598_3p    | 0,411 | 0,998 | 0,803 |
| hsa_miR_185_5p   | 0,361 | 0,998 | 1,224 | hsa_miR_7_5p      | 0,412 | 0,998 | 1,294 |
| hsa_miR_30b_5p   | 0,365 | 0,998 | 0,804 | hsa_miR_140_5p    | 0,417 | 0,998 | 1,208 |
| hsa_miR_1255b_5p | 0,366 | 0,998 | 1,222 | hsa_miR_223_3p    | 0,421 | 0,998 | 1,129 |
| hsa_miR_424_3p   | 0,366 | 0,998 | 1,295 | hsa_miR_195_5p    | 0,421 | 0,998 | 1,230 |
| hsa_miR_875_5p   | 0,367 | 0,998 | 0,729 | hsa_miR_625_5p    | 0,421 | 0,998 | 0,666 |
| hsa_miR_142_5p   | 0,368 | 0,998 | 0,793 | hsa_miR_155_5p    | 0,426 | 0,998 | 1,315 |
| hsa_miR_1256     | 0,373 | 0,998 | 0,708 | hsa_let_7f_5p     | 0,432 | 0,998 | 0,887 |
| hsa_miR_550a_5p  | 0,373 | 0,998 | 1,715 | hsa_miR_1275      | 0,435 | 0,998 | 1,073 |
| hsa_miR_125b_5p  | 0,374 | 0,998 | 0,861 | hsa_miR_744_3p    | 0,436 | 0,998 | 1,209 |
| hsa_miR_1275     | 0,382 | 0,998 | 1,126 | hsa_miR_339_5p    | 0,437 | 0,998 | 0,834 |
| hsa_let_7b_5p    | 0,389 | 0,998 | 0,806 | hsa_miR_1256      | 0,438 | 0,998 | 1,215 |
| hsa_miR_362_3p   | 0,389 | 0,998 | 0,635 | hsa_miR_517c_3p   | 0,438 | 0,998 | 1,267 |
| hsa_miR_591      | 0,393 | 0,998 | 0,756 | hsa_miR_629_5p    | 0,441 | 0,998 | 0,792 |
| hsa_miR_30e_3p   | 0,399 | 0,998 | 1,328 | hsa_miR_142_5p    | 0,441 | 0,998 | 0,832 |
| hsa_miR_551b_3p  | 0,402 | 0,998 | 0,720 | hsa_miR_450a_5p   | 0,455 | 0,998 | 0,754 |
| hsa_miR_99b_5p   | 0,402 | 0,998 | 0,818 | hsa_miR_571       | 0,457 | 0,998 | 1,135 |
| hsa_miR_196b_5p  | 0,405 | 0,998 | 0,756 | hsa_miR_374b_5p   | 0,462 | 0,998 | 1,161 |
| hsa_let_7a_5p    | 0,405 | 0,998 | 1,119 | hsa_miR_10a_5p    | 0,463 | 0,998 | 0,809 |
| hsa_miR_223_3p   | 0,406 | 0,998 | 1,273 | hsa_miR_30b_5p    | 0,463 | 0,998 | 0,835 |
| hsa_miR_193a_5p  | 0,409 | 0,998 | 0,856 | hsa_miR_34b_3p    | 0,465 | 0,998 | 0,877 |
| hsa_miR_517c_3p  | 0,424 | 0,998 | 0,709 | hsa_miR_636       | 0,468 | 0,998 | 1,145 |
| hsa_miR_330_3p   | 0,429 | 0,998 | 1,520 | hsa_miR_523_3p    | 0,474 | 0,998 | 1,158 |
| hsa_miR_195_5p   | 0,430 | 0,998 | 1,351 | hsa_miR_33a_3p    | 0,474 | 0,998 | 0,758 |
| hsa_miR_1247_5p  | 0,431 | 0,998 | 1,121 | hsa_miR_424_5p    | 0,476 | 0,998 | 0,825 |
| hsa_miR_212_3p   | 0,432 | 0,998 | 1,153 | hsa_miR_211_5p    | 0,476 | 0,998 | 0,809 |
| hsa_miR_142_3p   | 0,432 | 0,998 | 0,867 | hsa_miR_589_3p    | 0,477 | 0,998 | 1,342 |
| hsa_miR_381_3p   | 0,444 | 0,998 | 0,713 | hsa_miR_491_5p    | 0,479 | 0,998 | 1,220 |
| hsa_miR_190b     | 0,444 | 0,998 | 0,838 | hsa_miR_15a_3p    | 0,480 | 0,998 | 0,797 |
| hsa_miR_93_5p    | 0,445 | 0,998 | 0,812 | hsa_miR_186_5p    | 0,482 | 0,998 | 1,232 |
| hsa_miR_1303     | 0,448 | 0,998 | 1,121 | hsa_miR_26b_3p    | 0,482 | 0,998 | 0,850 |
| hsa_miR_27a_3p   | 0,449 | 0,998 | 1,169 | hsa_miR_191_5p    | 0,482 | 0,998 | 1,268 |
| hsa_miR_100_5p   | 0,463 | 0,998 | 0,878 | hsa_miR_20a_5p    | 0,488 | 0,998 | 1,165 |
| hsa_miR_24_3p    | 0,467 | 0,998 | 1,340 | hsa_miR_26b_5p    | 0,488 | 0,998 | 1,198 |
| hsa_miR_99b_3p   | 0,469 | 0,998 | 1,229 | hsa_miR_21_3p     | 0,494 | 0,998 | 1,168 |
| hsa_miR_378a_5p  | 0,469 | 0,998 | 1,337 | hsa_miR_126_3p    | 0,499 | 0,998 | 1,197 |
| hsa_miR_361_5p   | 0,471 | 0,998 | 1,204 | hsa_miR_484       | 0,500 | 0,998 | 1,149 |
| hsa_miR_34a_3p   | 0,471 | 0,998 | 0,748 | hsa_miR_34a_3p    | 0,501 | 0,998 | 1,175 |
| hsa_miR_532_3p   | 0,486 | 0,998 | 1,341 | hsa_miR_663b      | 0,503 | 0,998 | 0,863 |
| hsa_miR_95_3p    | 0,486 | 0,998 | 1,263 | hsa_miR_224_5p    | 0,508 | 0,998 | 0,904 |
| hsa_miR_151a_5p  | 0,489 | 0,998 | 1,154 | hsa_miR_361_5p    | 0,511 | 0,998 | 0,873 |
| hsa_miR_143_3p   | 0,491 | 0,998 | 0,889 | hsa_miR_199a_3p   | 0,514 | 0,998 | 1,164 |
| hsa_miR_186_5p   | 0,493 | 0,998 | 1,223 | hsa_miR_1305      | 0,515 | 0,998 | 1,207 |
| hsa_let_7d_5p    | 0,493 | 0,998 | 0,816 | hsa_miR_661       | 0,518 | 0,998 | 1,074 |
| hsa_miR_224_5p   | 0,496 | 0,998 | 0,854 | hsa_miR_99b_3p    | 0,518 | 0,998 | 0,843 |
| hsa_miR_339_5p   | 0,502 | 0,998 | 1,356 | hsa_miR_520c_3p   | 0,520 | 0,998 | 1,173 |
| hsa_miR_511_5p   | 0,503 | 0,998 | 0,851 | hsa_miR_483_5p    | 0,523 | 0,998 | 1,148 |
| hsa_miR_20b_5p   | 0,504 | 0,998 | 0,790 | hsa_miR_15b_5p    | 0,523 | 0,998 | 1,108 |
| hsa_miR_140_5p   | 0,508 | 0,998 | 1,308 | hsa_miR_92a_1_5p  | 0,524 | 0,998 | 0,803 |
| hsa_miR_338_3p   | 0,511 | 0,998 | 0,850 | hsa_miR_616_5p    | 0,526 | 0,998 | 1,205 |
| hsa_miR_23a_3p   | 0,521 | 0,998 | 1,319 | hsa_miR_455_5p    | 0,529 | 0,998 | 0,787 |
| hsa_miR_211_5p   | 0,524 | 0,998 | 0,783 | hsa_miR_29b_3p    | 0,530 | 0,998 | 0,833 |
| hsa_miR_572      | 0,531 | 0,998 | 1,180 | hsa_miR_218_5p    | 0,530 | 0,998 | 1,199 |
| hsa_miR_449a     | 0,532 | 0,998 | 0,889 | hsa_miR_27a_3p    | 0,531 | 0,998 | 1,188 |
| hsa_miR_339_3p   | 0,534 | 0,998 | 1,131 | hsa_miR_22_5p     | 0,533 | 0,998 | 0,835 |
| hsa_miR_494_3p   | 0,537 | 0,998 | 0,862 | hsa_miR_25_3p     | 0,535 | 0,998 | 1,139 |
| hsa_miR_660_5p   | 0,537 | 0,998 | 1,110 | hsa_miR_885_5p    | 0,535 | 0,998 | 1,209 |

|                  |       |       |       |                 |       |       |       |
|------------------|-------|-------|-------|-----------------|-------|-------|-------|
| hsa_miR_16_5p    | 0,539 | 0,998 | 1,238 | hsa_miR_545_3p  | 0,539 | 0,998 | 1,274 |
| hsa_miR_182_5p   | 0,541 | 0,998 | 0,737 | hsa_miR_365a_3p | 0,547 | 0,998 | 0,904 |
| hsa_miR_331_3p   | 0,543 | 0,998 | 0,897 | hsa_miR_744_5p  | 0,554 | 0,998 | 1,129 |
| hsa_miR_424_5p   | 0,544 | 0,998 | 0,824 | hsa_miR_339_3p  | 0,554 | 0,998 | 0,881 |
| hsa_miR_34b_5p   | 0,545 | 0,998 | 0,914 | hsa_miR_574_3p  | 0,555 | 0,998 | 1,132 |
| hsa_miR_708_5p   | 0,546 | 0,998 | 0,859 | hsa_miR_138_5p  | 0,556 | 0,998 | 1,157 |
| hsa_miR_624_5p   | 0,553 | 0,998 | 0,809 | hsa_miR_622     | 0,557 | 0,998 | 1,138 |
| hsa_miR_652_3p   | 0,559 | 0,998 | 1,098 | hsa_miR_550a_5p | 0,558 | 0,998 | 1,207 |
| hsa_miR_663b     | 0,561 | 0,998 | 1,036 | hsa_miR_212_3p  | 0,558 | 0,998 | 1,157 |
| hsa_miR_454_3p   | 0,564 | 0,998 | 1,131 | hsa_miR_92a_3p  | 0,561 | 0,998 | 1,145 |
| hsa_miR_589_3p   | 0,566 | 0,998 | 1,303 | hsa_miR_31_5p   | 0,563 | 0,998 | 1,101 |
| hsa_miR_505_3p   | 0,570 | 0,998 | 0,800 | hsa_miR_363_3p  | 0,565 | 0,998 | 0,832 |
| hsa_miR_30d_5p   | 0,576 | 0,998 | 0,916 | hsa_miR_21_5p   | 0,565 | 0,998 | 1,099 |
| hsa_miR_126_3p   | 0,578 | 0,998 | 1,102 | hsa_miR_132_3p  | 0,568 | 0,998 | 1,086 |
| hsa_miR_183_3p   | 0,578 | 0,998 | 0,828 | hsa_miR_145_5p  | 0,568 | 0,998 | 1,082 |
| hsa_miR_622      | 0,581 | 0,998 | 0,672 | hsa_miR_20a_3p  | 0,569 | 0,998 | 1,239 |
| hsa_miR_425_5p   | 0,587 | 0,998 | 1,122 | hsa_miR_192_5p  | 0,572 | 0,998 | 0,847 |
| hsa_miR_200a_5p  | 0,587 | 0,998 | 0,878 | hsa_let_7a_5p   | 0,577 | 0,998 | 0,935 |
| hsa_miR_125a_3p  | 0,589 | 0,998 | 1,143 | hsa_miR_1825    | 0,581 | 0,998 | 1,091 |
| hsa_miR_99a_5p   | 0,595 | 0,998 | 0,912 | hsa_miR_429     | 0,587 | 0,998 | 0,885 |
| hsa_miR_148a_3p  | 0,596 | 0,998 | 0,902 | hsa_miR_200a_5p | 0,592 | 0,998 | 0,895 |
| hsa_miR_590_5p   | 0,601 | 0,998 | 1,117 | hsa_miR_500a_5p | 0,593 | 0,998 | 0,876 |
| hsa_miR_374a_5p  | 0,602 | 0,998 | 0,880 | hsa_miR_320a    | 0,600 | 0,998 | 1,215 |
| hsa_miR_483_3p   | 0,604 | 0,998 | 0,832 | hsa_miR_193a_5p | 0,601 | 0,998 | 1,087 |
| hsa_miR_92a_1_5p | 0,605 | 0,998 | 1,217 | hsa_miR_29a_3p  | 0,603 | 0,998 | 1,117 |
| hsa_miR_26b_3p   | 0,607 | 0,998 | 1,139 | hsa_miR_9_5p    | 0,604 | 0,998 | 0,823 |
| hsa_miR_130b_3p  | 0,610 | 0,998 | 0,912 | hsa_miR_128_3p  | 0,618 | 0,998 | 0,902 |
| hsa_miR_21_5p    | 0,610 | 0,998 | 0,909 | hsa_miR_22_3p   | 0,625 | 0,998 | 0,916 |
| hsa_miR_30d_3p   | 0,611 | 0,998 | 0,750 | hsa_miR_378a_5p | 0,625 | 0,998 | 0,855 |
| hsa_miR_101_3p   | 0,615 | 0,998 | 0,901 | hsa_miR_182_5p  | 0,626 | 0,998 | 0,848 |
| hsa_miR_1302     | 0,618 | 0,998 | 0,837 | hsa_miR_141_3p  | 0,651 | 0,998 | 0,910 |
| hsa_miR_23b_3p   | 0,618 | 0,998 | 0,837 | hsa_miR_26a_5p  | 0,651 | 0,998 | 0,865 |
| hsa_miR_191_5p   | 0,619 | 0,998 | 1,174 | hsa_miR_101_3p  | 0,652 | 0,998 | 0,861 |
| hsa_miR_20a_3p   | 0,630 | 0,998 | 0,767 | hsa_miR_106b_5p | 0,653 | 0,998 | 1,107 |
| hsa_miR_15b_5p   | 0,632 | 0,998 | 1,074 | hsa_miR_1291    | 0,653 | 0,998 | 1,112 |
| hsa_miR_135b_5p  | 0,636 | 0,998 | 0,892 | hsa_miR_340_3p  | 0,655 | 0,998 | 0,885 |
| hsa_miR_34b_3p   | 0,637 | 0,998 | 0,925 | hsa_miR_29c_3p  | 0,656 | 0,998 | 0,909 |
| hsa_miR_516b_3p  | 0,640 | 0,998 | 1,086 | hsa_miR_184     | 0,656 | 0,998 | 0,924 |
| hsa_miR_22_5p    | 0,640 | 0,998 | 1,150 | hsa_miR_345_5p  | 0,662 | 0,998 | 1,120 |
| hsa_miR_200c_3p  | 0,642 | 0,998 | 0,906 | hsa_miR_539_5p  | 0,666 | 0,998 | 1,140 |
| hsa_miR_30c_5p   | 0,645 | 0,998 | 0,881 | hsa_miR_551b_5p | 0,673 | 0,998 | 1,110 |
| hsa_miR_328_3p   | 0,646 | 0,998 | 0,911 | hsa_miR_590_5p  | 0,674 | 0,998 | 1,135 |
| hsa_miR_376c_3p  | 0,646 | 0,998 | 0,790 | hsa_miR_30a_3p  | 0,679 | 0,998 | 0,893 |
| hsa_miR_616_3p   | 0,648 | 0,998 | 1,183 | hsa_miR_135b_5p | 0,685 | 0,998 | 1,102 |
| hsa_miR_625_3p   | 0,651 | 0,998 | 1,150 | hsa_miR_532_5p  | 0,690 | 0,998 | 1,062 |
| hsa_miR_200b_3p  | 0,656 | 0,998 | 0,920 | hsa_miR_769_5p  | 0,691 | 0,998 | 0,928 |
| hsa_miR_146a_5p  | 0,666 | 0,998 | 1,128 | hsa_miR_29a_5p  | 0,692 | 0,998 | 1,149 |
| hsa_miR_1276     | 0,667 | 0,998 | 1,127 | hsa_miR_193a_3p | 0,697 | 0,998 | 0,853 |
| hsa_miR_518f_3p  | 0,675 | 0,998 | 1,264 | hsa_miR_328_3p  | 0,699 | 0,998 | 1,082 |
| hsa_miR_340_5p   | 0,683 | 0,998 | 1,099 | hsa_miR_28_5p   | 0,699 | 0,998 | 1,090 |
| hsa_miR_1183     | 0,688 | 0,998 | 1,092 | hsa_miR_23b_3p  | 0,700 | 0,998 | 0,935 |
| hsa_miR_636      | 0,689 | 0,998 | 1,128 | hsa_miR_203a_3p | 0,703 | 0,998 | 0,944 |
| hsa_miR_409_3p   | 0,689 | 0,998 | 1,236 | hsa_let_7b_5p   | 0,704 | 0,998 | 1,116 |
| hsa_miR_625_5p   | 0,690 | 0,998 | 1,183 | hsa_miR_604     | 0,708 | 0,998 | 1,071 |
| hsa_miR_146b_3p  | 0,694 | 0,998 | 1,082 | hsa_miR_618     | 0,708 | 0,998 | 1,131 |
| hsa_miR_192_5p   | 0,697 | 0,998 | 1,116 | hsa_miR_628_3p  | 0,709 | 0,998 | 0,937 |
| hsa_miR_548b_5p  | 0,703 | 0,998 | 1,069 | hsa_miR_126_5p  | 0,713 | 0,998 | 1,090 |
| hsa_miR_155_5p   | 0,711 | 0,998 | 1,092 | hsa_miR_323a_3p | 0,714 | 0,998 | 1,120 |
| hsa_miR_425_3p   | 0,714 | 0,998 | 1,126 | hsa_miR_127_3p  | 0,715 | 0,998 | 0,882 |
| hsa_miR_324_5p   | 0,717 | 0,998 | 0,923 | hsa_miR_645     | 0,718 | 0,998 | 1,087 |
| hsa_miR_505_5p   | 0,718 | 0,998 | 1,104 | hsa_miR_483_3p  | 0,719 | 0,998 | 1,065 |
| hsa_miR_486_5p   | 0,718 | 0,998 | 0,954 | hsa_miR_106b_3p | 0,723 | 0,998 | 0,925 |
| hsa_miR_374b_3p  | 0,718 | 0,998 | 0,877 | hsa_miR_135a_5p | 0,725 | 0,998 | 0,905 |
| hsa_miR_29c_3p   | 0,723 | 0,998 | 0,873 | hsa_miR_572     | 0,725 | 0,998 | 1,084 |
| hsa_miR_1180_3p  | 0,724 | 0,998 | 1,077 | hsa_miR_409_3p  | 0,725 | 0,998 | 1,067 |
| hsa_miR_222_3p   | 0,735 | 0,998 | 0,889 | hsa_miR_629_3p  | 0,728 | 0,998 | 1,088 |
| hsa_miR_345_5p   | 0,746 | 0,998 | 1,095 | hsa_miR_494_3p  | 0,733 | 0,998 | 1,097 |
| hsa_miR_145_5p   | 0,747 | 0,998 | 1,092 | hsa_miR_99a_3p  | 0,734 | 0,998 | 0,926 |
| hsa_miR_1267     | 0,749 | 0,998 | 0,895 | hsa_miR_99b_5p  | 0,737 | 0,998 | 1,064 |
| hsa_miR_25_3p    | 0,750 | 0,998 | 0,933 | hsa_miR_150_5p  | 0,737 | 0,998 | 1,068 |
| hsa_miR_98_5p    | 0,750 | 0,998 | 1,082 | hsa_miR_331_5p  | 0,737 | 0,998 | 1,085 |
| hsa_miR_1262     | 0,752 | 0,998 | 1,122 | hsa_miR_324_3p  | 0,738 | 0,998 | 0,937 |
| hsa_miR_99a_3p   | 0,752 | 0,998 | 0,887 | hsa_miR_589_5p  | 0,744 | 0,998 | 1,105 |
| hsa_miR_483_5p   | 0,755 | 0,998 | 1,061 | hsa_miR_301a_3p | 0,748 | 0,998 | 1,138 |
| hsa_miR_152_3p   | 0,762 | 0,998 | 0,927 | hsa_miR_99a_5p  | 0,749 | 0,998 | 0,950 |
| hsa_miR_618      | 0,766 | 0,998 | 0,916 | hsa_miR_331_3p  | 0,755 | 0,998 | 1,064 |
| hsa_miR_30a_5p   | 0,770 | 0,998 | 0,945 | hsa_miR_187_3p  | 0,760 | 0,998 | 0,923 |
| hsa_miR_532_5p   | 0,773 | 0,998 | 0,942 | hsa_miR_145_3p  | 0,762 | 0,998 | 1,134 |
| hsa_miR_491_5p   | 0,776 | 0,998 | 1,119 | hsa_miR_193b_3p | 0,767 | 0,998 | 1,067 |
| hsa_miR_27b_3p   | 0,777 | 0,998 | 0,950 | hsa_miR_338_3p  | 0,767 | 0,998 | 1,085 |
| hsa_miR_518d_3p  | 0,778 | 0,998 | 0,947 | hsa_miR_425_5p  | 0,768 | 0,998 | 1,058 |
| hsa_miR_1825     | 0,780 | 0,998 | 1,068 | hsa_miR_103a_3p | 0,769 | 0,998 | 0,950 |



|                   |       |       |       |                  |       |       |       |
|-------------------|-------|-------|-------|------------------|-------|-------|-------|
| hsa_miR_571       | 0,790 | 0,998 | 0,900 | hsa_miR_381_3p   | 0,771 | 0,998 | 1,055 |
| hsa_miR_20a_5p    | 0,791 | 0,998 | 0,941 | hsa_miR_424_3p   | 0,772 | 0,998 | 0,925 |
| hsa_miR_623       | 0,795 | 0,998 | 0,904 | hsa_miR_29b_2_5p | 0,777 | 0,998 | 0,898 |
| hsa_let_7g_5p     | 0,798 | 0,998 | 1,085 | hsa_miR_30c_5p   | 0,779 | 0,998 | 1,058 |
| hsa_miR_103a_3p   | 0,803 | 0,998 | 1,047 | hsa_miR_19b_3p   | 0,779 | 0,998 | 1,052 |
| hsa_miR_28_5p     | 0,803 | 0,998 | 0,952 | hsa_miR_1244     | 0,780 | 0,998 | 1,074 |
| hsa_miR_15a_3p    | 0,804 | 0,998 | 0,910 | hsa_miR_623      | 0,786 | 0,998 | 1,063 |
| hsa_miR_181c_5p   | 0,807 | 0,998 | 1,168 | hsa_miR_205_5p   | 0,786 | 0,998 | 0,961 |
| hsa_miR_520d_3p   | 0,810 | 0,998 | 1,052 | hsa_miR_625_3p   | 0,786 | 0,998 | 0,947 |
| hsa_miR_423_5p    | 0,812 | 0,998 | 0,960 | hsa_miR_639      | 0,786 | 0,998 | 1,065 |
| hsa_miR_193a_3p   | 0,815 | 0,998 | 1,101 | hsa_miR_652_3p   | 0,788 | 0,998 | 1,053 |
| hsa_miR_30a_3p    | 0,818 | 0,998 | 0,951 | hsa_miR_548b_5p  | 0,793 | 0,998 | 1,052 |
| hsa_miR_502_3p    | 0,821 | 0,998 | 0,891 | hsa_miR_16_1_3p  | 0,797 | 0,998 | 1,085 |
| hsa_miR_1227_3p   | 0,825 | 0,998 | 1,044 | hsa_miR_148a_3p  | 0,800 | 0,998 | 1,050 |
| hsa_miR_301a_3p   | 0,825 | 0,998 | 0,944 | hsa_miR_144_5p   | 0,811 | 0,998 | 0,916 |
| hsa_miR_193b_3p   | 0,833 | 0,998 | 0,961 | hsa_miR_324_5p   | 0,817 | 0,998 | 1,050 |
| hsa_miR_127_3p    | 0,833 | 0,998 | 1,080 | hsa_miR_143_3p   | 0,818 | 0,998 | 0,957 |
| hsa_miR_320b      | 0,834 | 0,998 | 0,957 | hsa_miR_616_3p   | 0,821 | 0,998 | 1,060 |
| hsa_miR_149_5p    | 0,835 | 0,998 | 1,039 | hsa_miR_518d_3p  | 0,823 | 0,998 | 0,963 |
| hsa_miR_33a_3p    | 0,841 | 0,998 | 1,128 | hsa_miR_376c_3p  | 0,828 | 0,998 | 0,916 |
| hsa_miR_539_5p    | 0,847 | 0,998 | 1,149 | hsa_miR_489_3p   | 0,828 | 0,998 | 1,067 |
| hsa_miR_362_5p    | 0,848 | 0,998 | 1,057 | hsa_miR_597_5p   | 0,830 | 0,998 | 0,949 |
| hsa_miR_29a_3p    | 0,851 | 0,998 | 1,054 | hsa_miR_125b_5p  | 0,840 | 0,998 | 0,977 |
| hsa_miR_661       | 0,852 | 0,998 | 0,975 | hsa_miR_30a_5p   | 0,840 | 0,998 | 0,965 |
| hsa_miR_221_3p    | 0,854 | 0,998 | 1,044 | hsa_miR_95_3p    | 0,850 | 0,998 | 0,953 |
| hsa_miR_28_3p     | 0,858 | 0,998 | 0,925 | hsa_miR_19a_3p   | 0,854 | 0,998 | 1,040 |
| hsa_miR_574_3p    | 0,865 | 0,998 | 1,040 | hsa_miR_146b_5p  | 0,860 | 0,998 | 0,954 |
| hsa_miR_885_5p    | 0,868 | 0,998 | 1,054 | hsa_miR_149_5p   | 0,863 | 0,998 | 0,970 |
| hsa_miR_766_3p    | 0,868 | 0,998 | 0,976 | hsa_miR_320b     | 0,868 | 0,998 | 1,032 |
| hsa_miR_150_5p    | 0,869 | 0,998 | 0,960 | hsa_miR_221_3p   | 0,871 | 0,998 | 0,971 |
| hsa_miR_19b_3p    | 0,869 | 0,998 | 0,963 | hsa_miR_548i     | 0,875 | 0,998 | 0,934 |
| hsa_miR_126_5p    | 0,870 | 0,998 | 0,955 | hsa_miR_30e_3p   | 0,875 | 0,998 | 0,957 |
| hsa_miR_548c_5p   | 0,871 | 0,998 | 0,974 | hsa_miR_340_5p   | 0,876 | 0,998 | 1,035 |
| hsa_miR_106b_5p   | 0,872 | 0,998 | 1,035 | hsa_miR_210_3p   | 0,877 | 0,998 | 0,980 |
| hsa_miR_650       | 0,874 | 0,998 | 1,028 | hsa_miR_875_5p   | 0,877 | 0,998 | 0,969 |
| hsa_miR_365a_3p   | 0,876 | 0,998 | 0,962 | hsa_miR_548d_5p  | 0,878 | 0,998 | 0,974 |
| hsa_miR_9_3p      | 0,884 | 0,998 | 1,074 | hsa_miR_9_3p     | 0,880 | 0,998 | 1,057 |
| hsa_miR_137       | 0,886 | 0,998 | 1,051 | hsa_miR_642a_5p  | 0,893 | 0,998 | 0,978 |
| hsa_miR_31_3p     | 0,887 | 0,998 | 1,033 | hsa_miR_200c_3p  | 0,893 | 0,998 | 0,971 |
| hsa_miR_125a_5p   | 0,894 | 0,998 | 0,964 | hsa_miR_451a     | 0,895 | 0,998 | 0,984 |
| hsa_miR_605_5p    | 0,895 | 0,998 | 1,025 | hsa_miR_374b_3p  | 0,897 | 0,998 | 0,969 |
| hsa_miR_1244      | 0,897 | 0,998 | 1,033 | hsa_miR_942_5p   | 0,908 | 0,998 | 1,026 |
| hsa_miR_106a_5p   | 0,897 | 0,998 | 1,049 | hsa_miR_1260a    | 0,910 | 0,998 | 1,015 |
| hsa_miR_17_5p     | 0,898 | 0,998 | 0,959 | hsa_miR_206      | 0,912 | 0,998 | 0,965 |
| hsa_miR_128_3p    | 0,901 | 0,998 | 1,027 | hsa_miR_660_5p   | 0,912 | 0,998 | 1,021 |
| hsa_miR_1208      | 0,913 | 0,998 | 1,056 | hsa_miR_181a_5p  | 0,913 | 0,998 | 1,021 |
| hsa_miR_380_5p    | 0,915 | 0,998 | 1,018 | hsa_miR_196b_5p  | 0,915 | 0,998 | 0,968 |
| hsa_miR_199a_3p   | 0,917 | 0,998 | 1,021 | hsa_miR_30d_5p   | 0,917 | 0,998 | 1,016 |
| hsa_miR_548d_5p   | 0,919 | 0,998 | 0,983 | hsa_miR_375      | 0,917 | 0,998 | 1,014 |
| hsa_miR_597_5p    | 0,924 | 0,998 | 1,023 | hsa_miR_886_3p   | 0,919 | 0,998 | 0,981 |
| hsa_miR_645       | 0,924 | 0,998 | 1,033 | hsa_miR_548c_5p  | 0,921 | 0,998 | 0,980 |
| hsa_miR_26a_5p    | 0,924 | 0,998 | 1,030 | hsa_miR_151a_3p  | 0,922 | 0,998 | 0,983 |
| hsa_miR_19b_1_5p  | 0,926 | 0,998 | 0,972 | hsa_miR_98_5p    | 0,924 | 0,998 | 0,981 |
| hsa_miR_181a_2_3p | 0,927 | 0,998 | 1,043 | hsa_miR_137      | 0,927 | 0,998 | 1,022 |
| hsa_miR_7_5p      | 0,935 | 0,998 | 1,021 | hsa_miR_342_3p   | 0,927 | 0,998 | 1,023 |
| hsa_miR_144_5p    | 0,937 | 0,998 | 0,984 | hsa_miR_200b_3p  | 0,932 | 0,998 | 0,986 |
| hsa_miR_489_3p    | 0,939 | 0,998 | 1,020 | hsa_miR_27a_5p   | 0,935 | 0,998 | 1,021 |
| hsa_miR_146b_5p   | 0,942 | 0,998 | 0,986 | hsa_miR_425_3p   | 0,947 | 0,998 | 1,014 |
| hsa_miR_374b_5p   | 0,944 | 0,998 | 1,014 | hsa_miR_148b_5p  | 0,954 | 0,998 | 0,980 |
| hsa_miR_151a_3p   | 0,948 | 0,998 | 1,021 | hsa_miR_1270     | 0,954 | 0,998 | 0,987 |
| hsa_miR_181a_5p   | 0,950 | 0,998 | 1,016 | hsa_miR_624_5p   | 0,961 | 0,998 | 1,012 |
| hsa_miR_335_5p    | 0,955 | 0,998 | 1,011 | hsa_miR_183_3p   | 0,970 | 0,998 | 0,992 |
| hsa_miR_639       | 0,957 | 0,998 | 0,975 | hsa_miR_141_5p   | 0,970 | 0,998 | 1,013 |
| hsa_miR_194_5p    | 0,959 | 0,998 | 0,984 | hsa_miR_34a_5p   | 0,970 | 0,998 | 1,008 |
| hsa_miR_31_5p     | 0,960 | 0,998 | 1,008 | hsa_miR_183_5p   | 0,971 | 0,998 | 0,986 |
| hsa_miR_26b_5p    | 0,966 | 0,998 | 0,987 | hsa_miR_142_3p   | 0,971 | 0,998 | 1,008 |
| hsa_miR_342_3p    | 0,974 | 0,998 | 0,994 | hsa_miR_222_5p   | 0,972 | 0,998 | 0,993 |
| hsa_miR_451a      | 0,975 | 0,998 | 0,996 | hsa_miR_486_5p   | 0,976 | 0,998 | 0,993 |
| hsa_miR_218_5p    | 0,976 | 0,998 | 1,007 | hsa_miR_202_3p   | 0,976 | 0,998 | 1,009 |
| hsa_miR_1305      | 0,977 | 0,998 | 1,011 | hsa_miR_1302     | 0,981 | 0,998 | 0,994 |
| hsa_miR_191_3p    | 0,979 | 0,998 | 1,008 | hsa_miR_23a_5p   | 0,983 | 0,998 | 0,993 |
| hsa_miR_19a_3p    | 0,982 | 0,998 | 1,006 | hsa_miR_100_5p   | 0,984 | 0,998 | 1,003 |
| hsa_miR_18a_5p    | 0,982 | 0,998 | 1,005 | hsa_miR_93_3p    | 0,986 | 0,998 | 0,997 |
| hsa_miR_1270      | 0,983 | 0,998 | 1,007 | hsa_miR_532_3p   | 0,987 | 0,998 | 0,996 |
| hsa_miR_18a_3p    | 0,988 | 0,998 | 1,008 | hsa_let_7c_5p    | 0,991 | 0,998 | 1,002 |
| hsa_miR_324_3p    | 0,988 | 0,998 | 0,996 | hsa_miR_337_5p   | 0,995 | 0,998 | 0,999 |
| hsa_miR_769_5p    | 0,997 | 0,999 | 1,001 | hsa_miR_190a_5p  | 0,995 | 0,998 | 1,002 |
| hsa_miR_616_5p    | 0,998 | 0,999 | 0,999 | hsa_miR_140_3p   | 0,996 | 0,998 | 0,998 |
| hsa_miR_132_3p    | 0,999 | 0,999 | 1,000 | hsa_miR_374a_5p  | 0,998 | 0,998 | 1,000 |

**TABLE S13.** Multivariate logistic regression analysis

|                    |                                  |
|--------------------|----------------------------------|
| <b>Dependent Y</b> | c-AR<br>within_1st_year_after_Tx |
|--------------------|----------------------------------|

|                                 |          |
|---------------------------------|----------|
| <b>Method</b>                   | Stepwise |
| <b>Enter variable if P&lt;</b>  | 0,06     |
| <b>Remove variable if P&gt;</b> | 0,1      |

|                       |             |
|-----------------------|-------------|
| <b>Sample size</b>    | 22          |
| <b>Cases with Y=0</b> | 17 (77.27%) |
| <b>Cases with Y=1</b> | 5 (22.73%)  |

**Overall Model Fit**

|                                     |            |
|-------------------------------------|------------|
| <b>Null model -2 Log Likelihood</b> | 23,582     |
| <b>Full model -2 Log Likelihood</b> | 15,12      |
| <b>Chi-square</b>                   | 8,463      |
| <b>DF</b>                           | 1          |
| <b>Significance level</b>           | P = 0.0036 |

**Coefficients and Standard Errors**

| <b>Variable</b>   | <b>Coefficient</b> | <b>Std. Error</b> | <b>P</b> |
|-------------------|--------------------|-------------------|----------|
| miRNA_classes=bad | 3,4012             | 1,34784           | 0,0116   |
| Constant          | -2,7081            |                   |          |

**Variables not included in the model**

|                                |
|--------------------------------|
| miR-148b-5p=LOW                |
| miR-744-3p=HIGH                |
| Age mismatch ≥1.2              |
| Warm ischemia                  |
| BEST FEV1≥80%                  |
| CMV mismatch                   |
| DBD vs DCD=DCD                 |
| Disease                        |
| ECMO                           |
| LAS≥40                         |
| Mechanical_ventilation >2 days |
| MP                             |
| Oto>5                          |
| Pneumonia                      |
| Sex_mismatch                   |
| smoking_habit                  |
| PGDmax                         |

**Odds Ratios and 95% Confidence Intervals**

| <b>Variable</b>   | <b>Odds ratio</b> | <b>95% CI</b>      |
|-------------------|-------------------|--------------------|
| miRNA_classes=bad | 30                | 2.1371 to 421.1375 |

**Classification table (cut-off value p=0.5)**

| <b>Actual group</b>                          | <b>Predicted group</b> |          | <b>Percent correct</b> |
|----------------------------------------------|------------------------|----------|------------------------|
|                                              | <b>0</b>               | <b>1</b> |                        |
| <b>Y = 0</b>                                 | 15                     | 2        | 88,24%                 |
| <b>Y = 1</b>                                 | 1                      | 4        | 80,00%                 |
| <b>Percent of cases correctly classified</b> |                        |          | 86,36%                 |

**ROC curve analysis**

|                                       |                |
|---------------------------------------|----------------|
| <b>Area under the ROC curve (AUC)</b> | 0,841          |
| <b>Standard Error</b>                 | 0,116          |
| <b>95% Confidence interval</b>        | 0.624 to 0.960 |
